# Supplementary material
Source: PubMed Central journal article supplement (PMC3567861)
Supplement: supp_M112.019786_mcp.M112.019786-29.pdf [file supp_M112.019786_mcp.M112.019786-29.pdf]

J

U201

P84243  
0004

P84243  
0008
