# Supplementary material
Source: PubMed Central journal article supplement (PMC3567861)

# 2D IEF

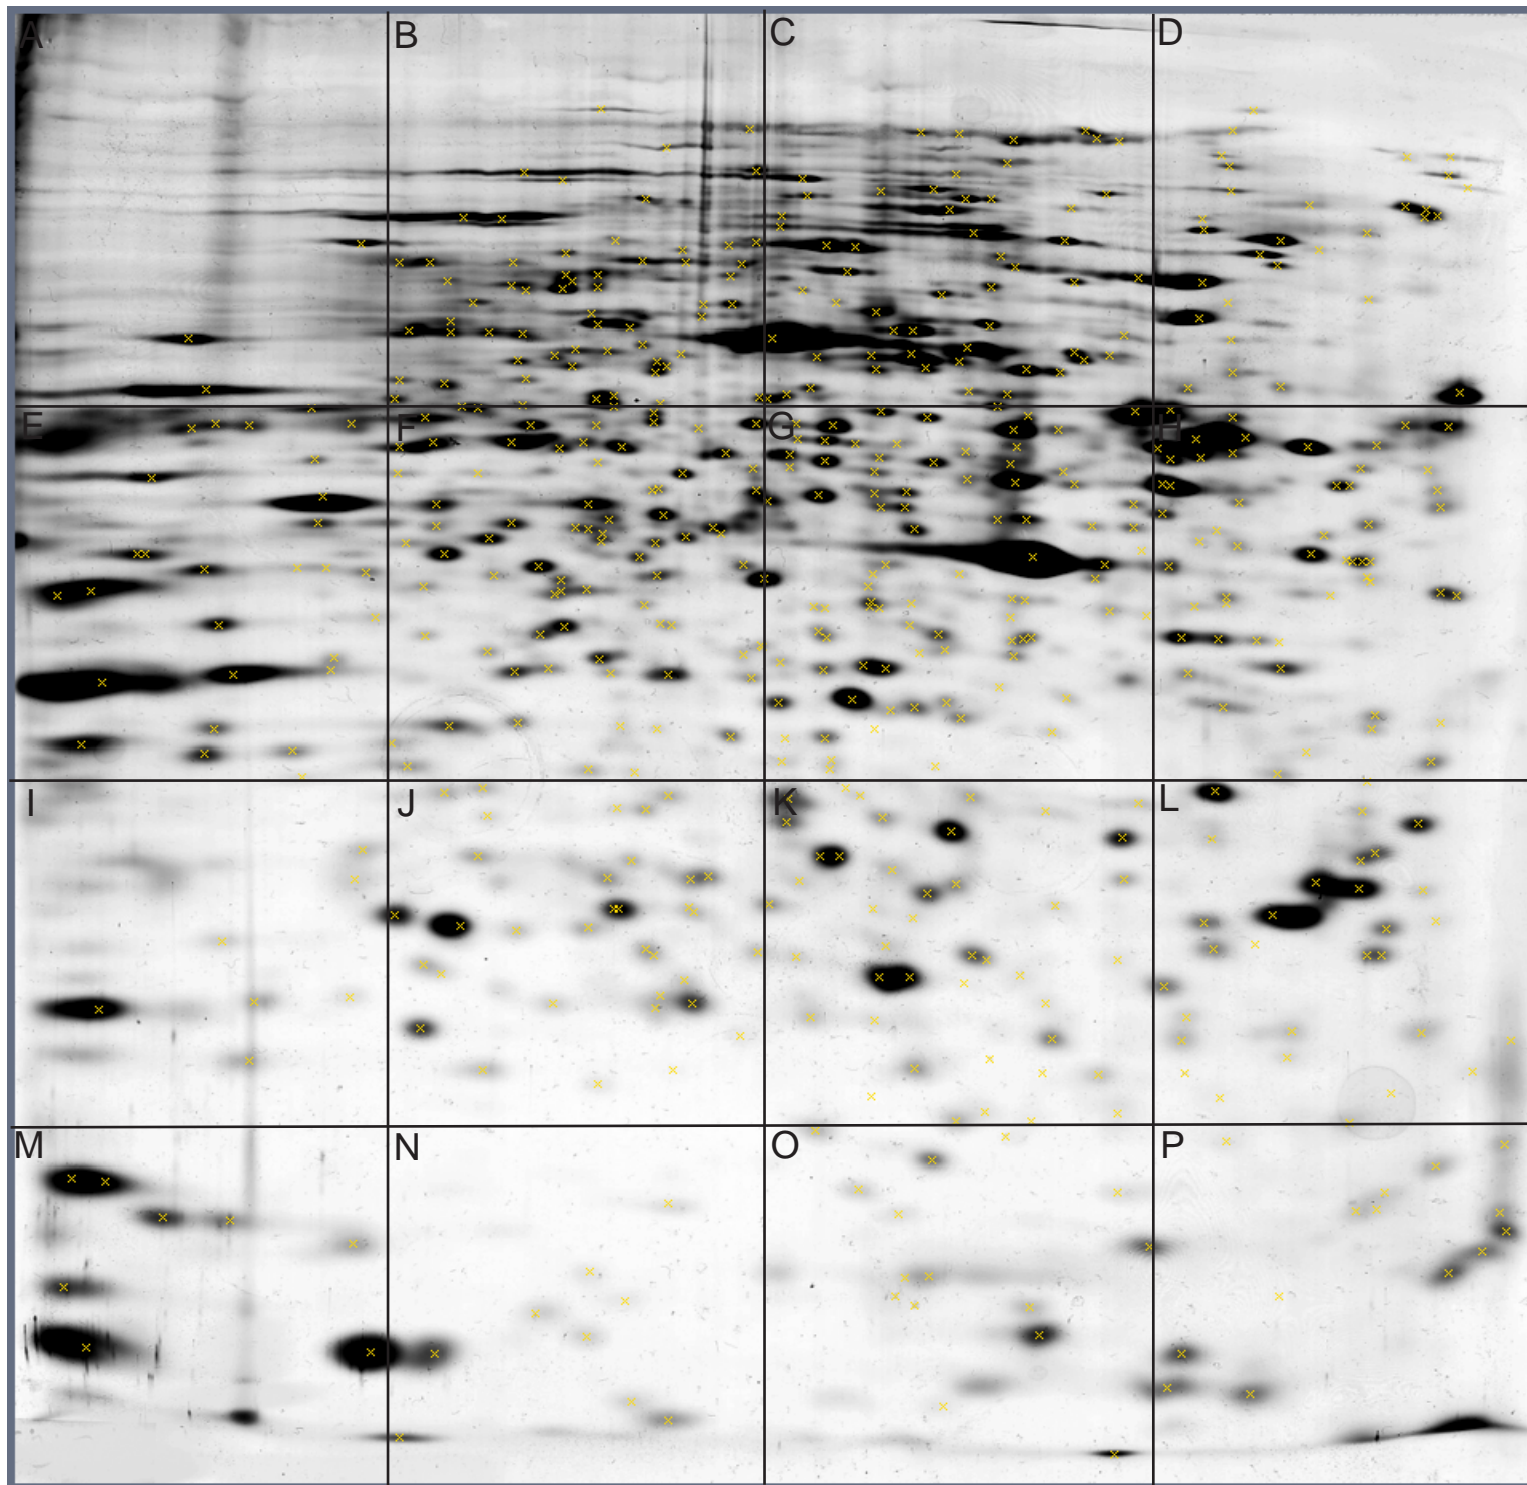

Supplement: supp_M112.019786_mcp.M112.019786-1.pdf [file supp_M112.019786_mcp.M112.019786-1.pdf]

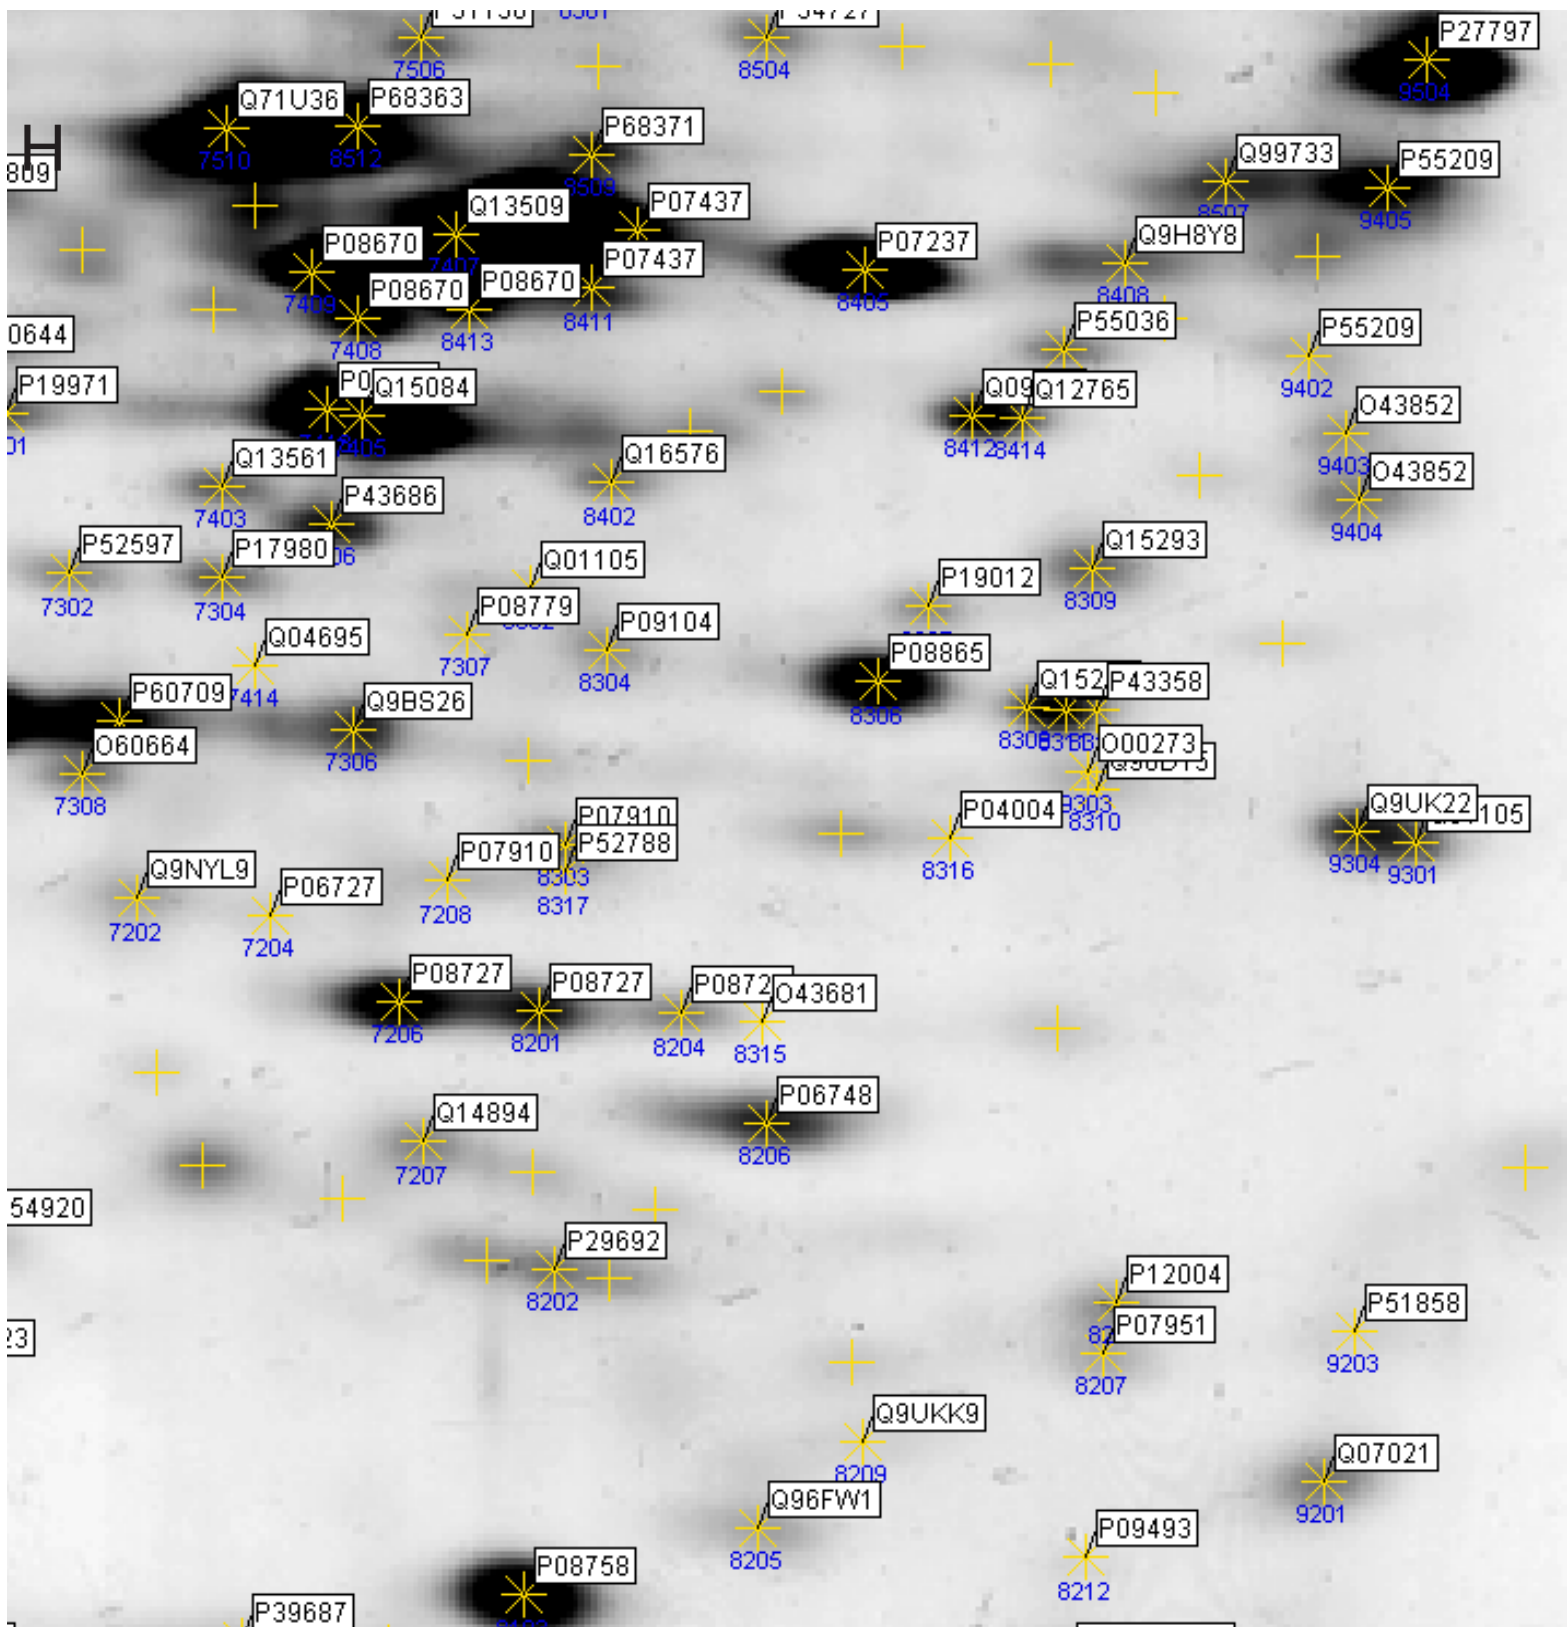

Supplement: supp_M112.019786_mcp.M112.019786-10.pdf [file supp_M112.019786_mcp.M112.019786-10.pdf]

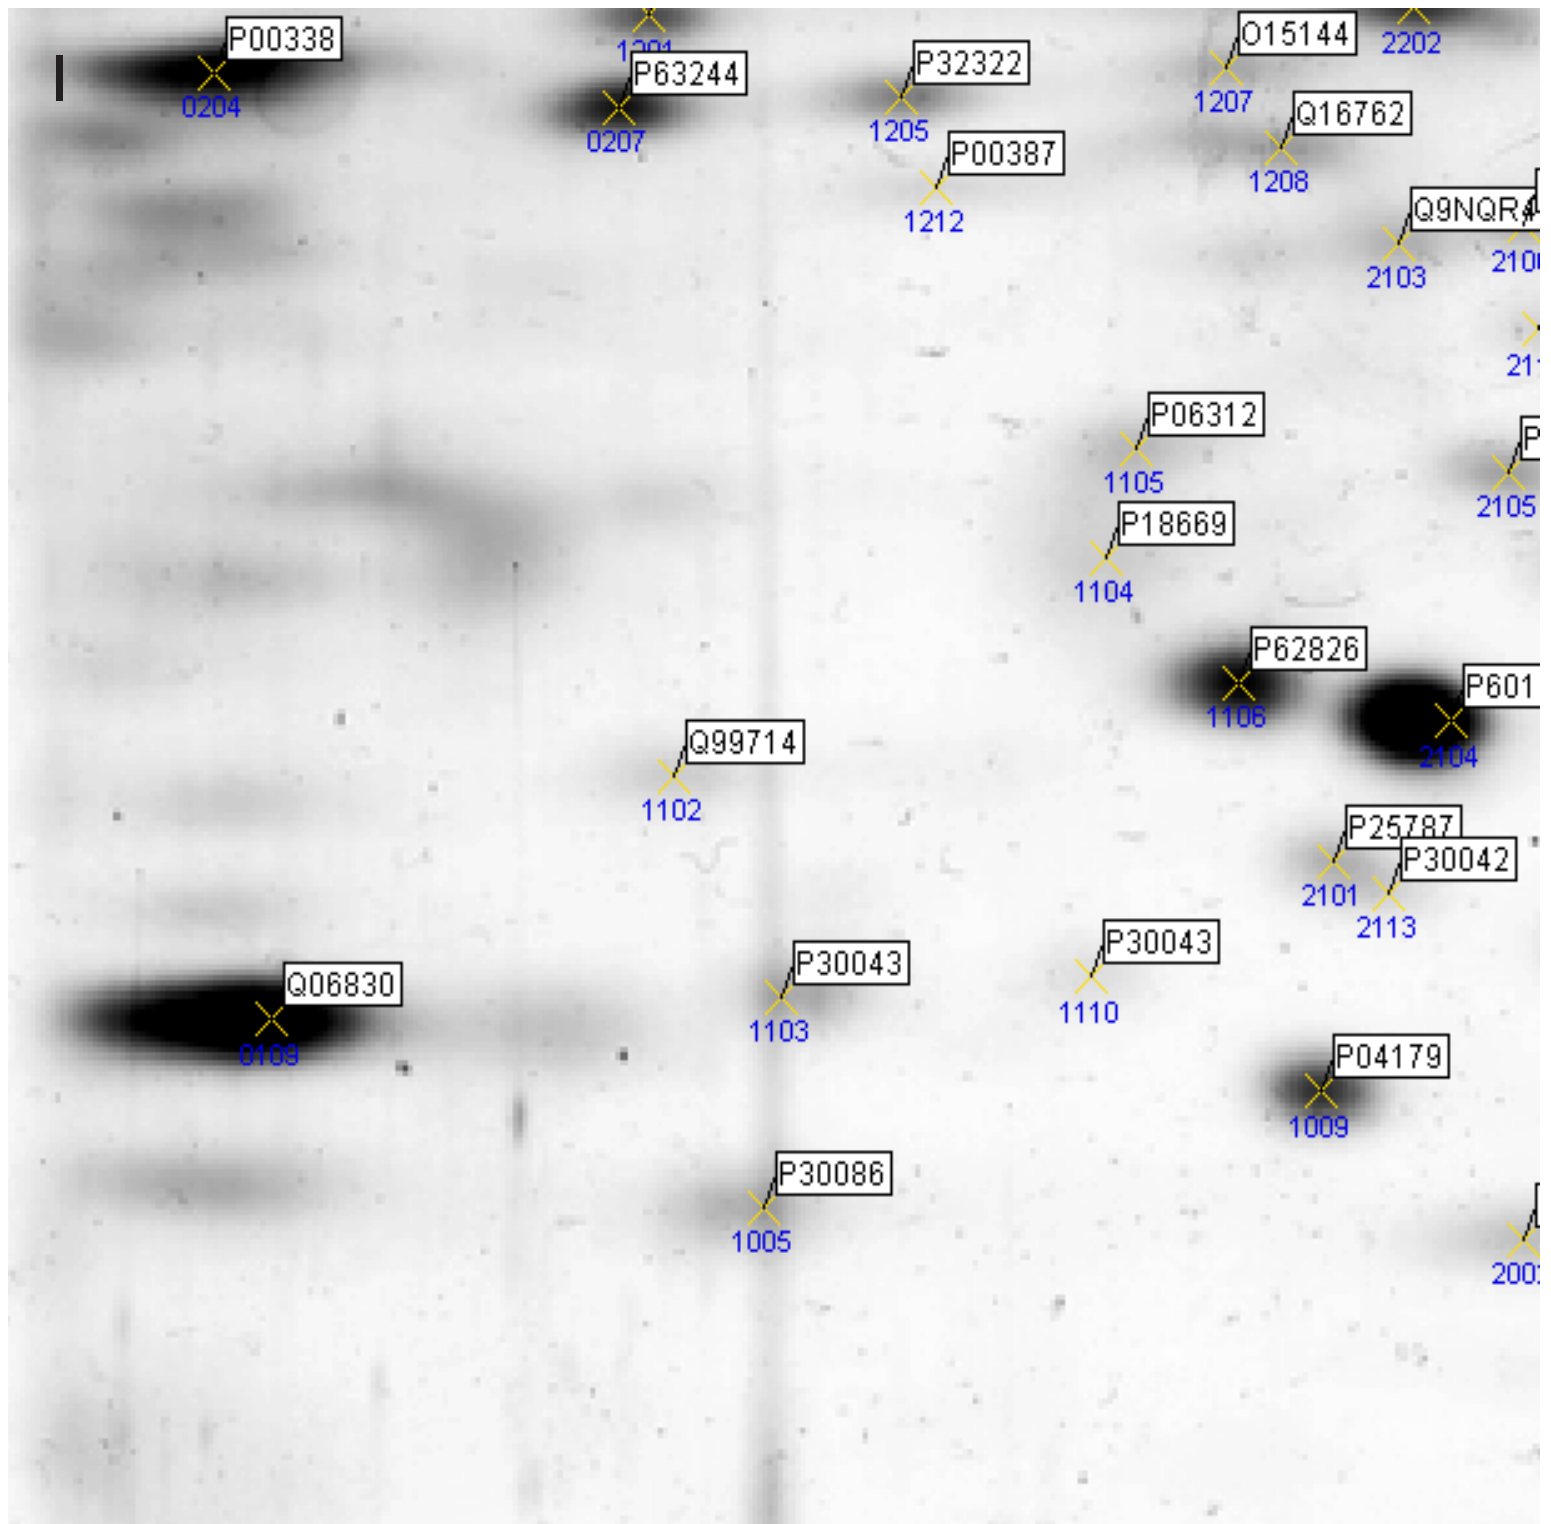

Supplement: supp_M112.019786_mcp.M112.019786-11.pdf [file supp_M112.019786_mcp.M112.019786-11.pdf]

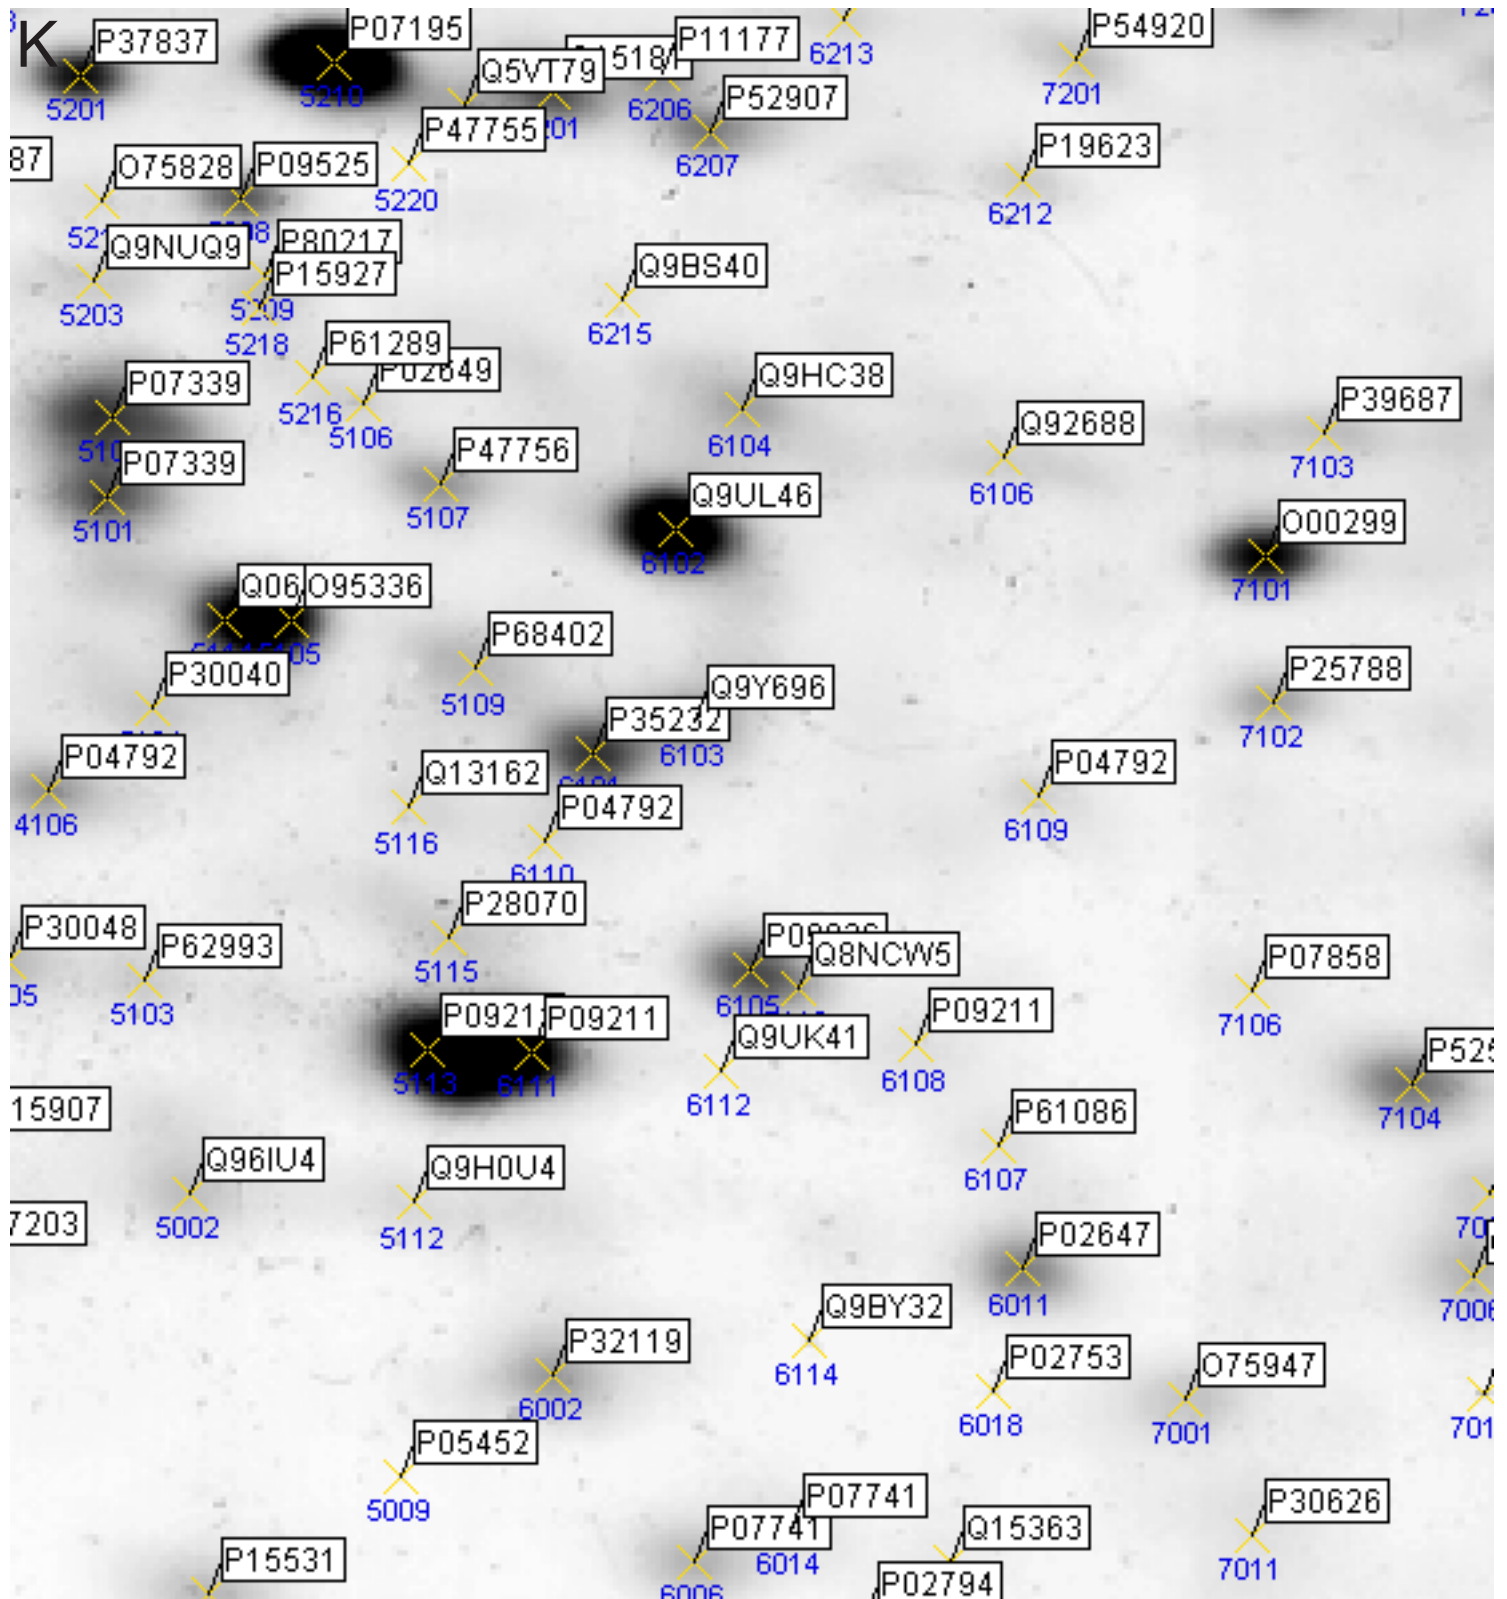

Supplement: supp_M112.019786_mcp.M112.019786-13.pdf [file supp_M112.019786_mcp.M112.019786-13.pdf]

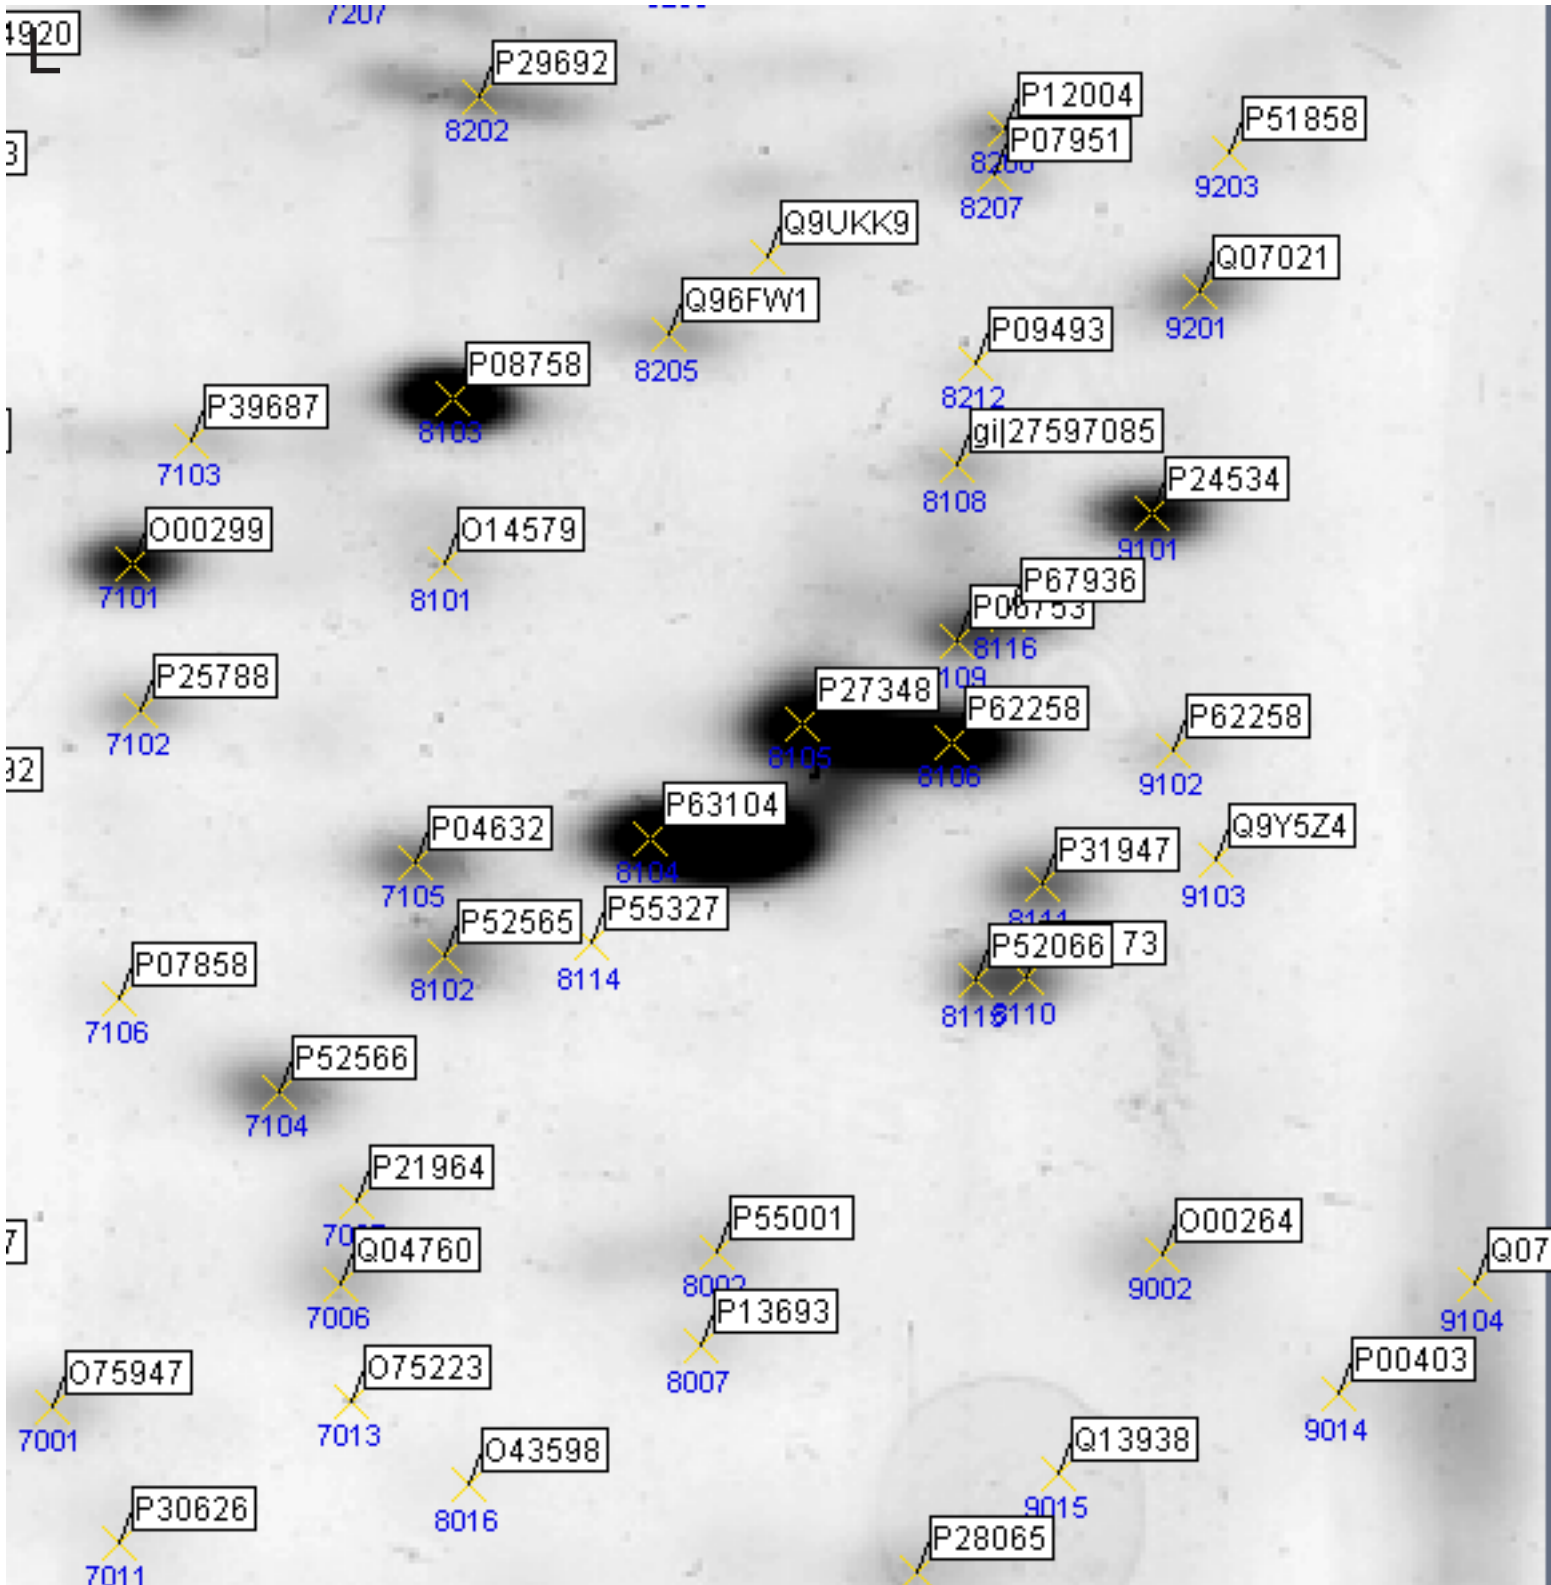

Supplement: supp_M112.019786_mcp.M112.019786-14.pdf [file supp_M112.019786_mcp.M112.019786-14.pdf]

M

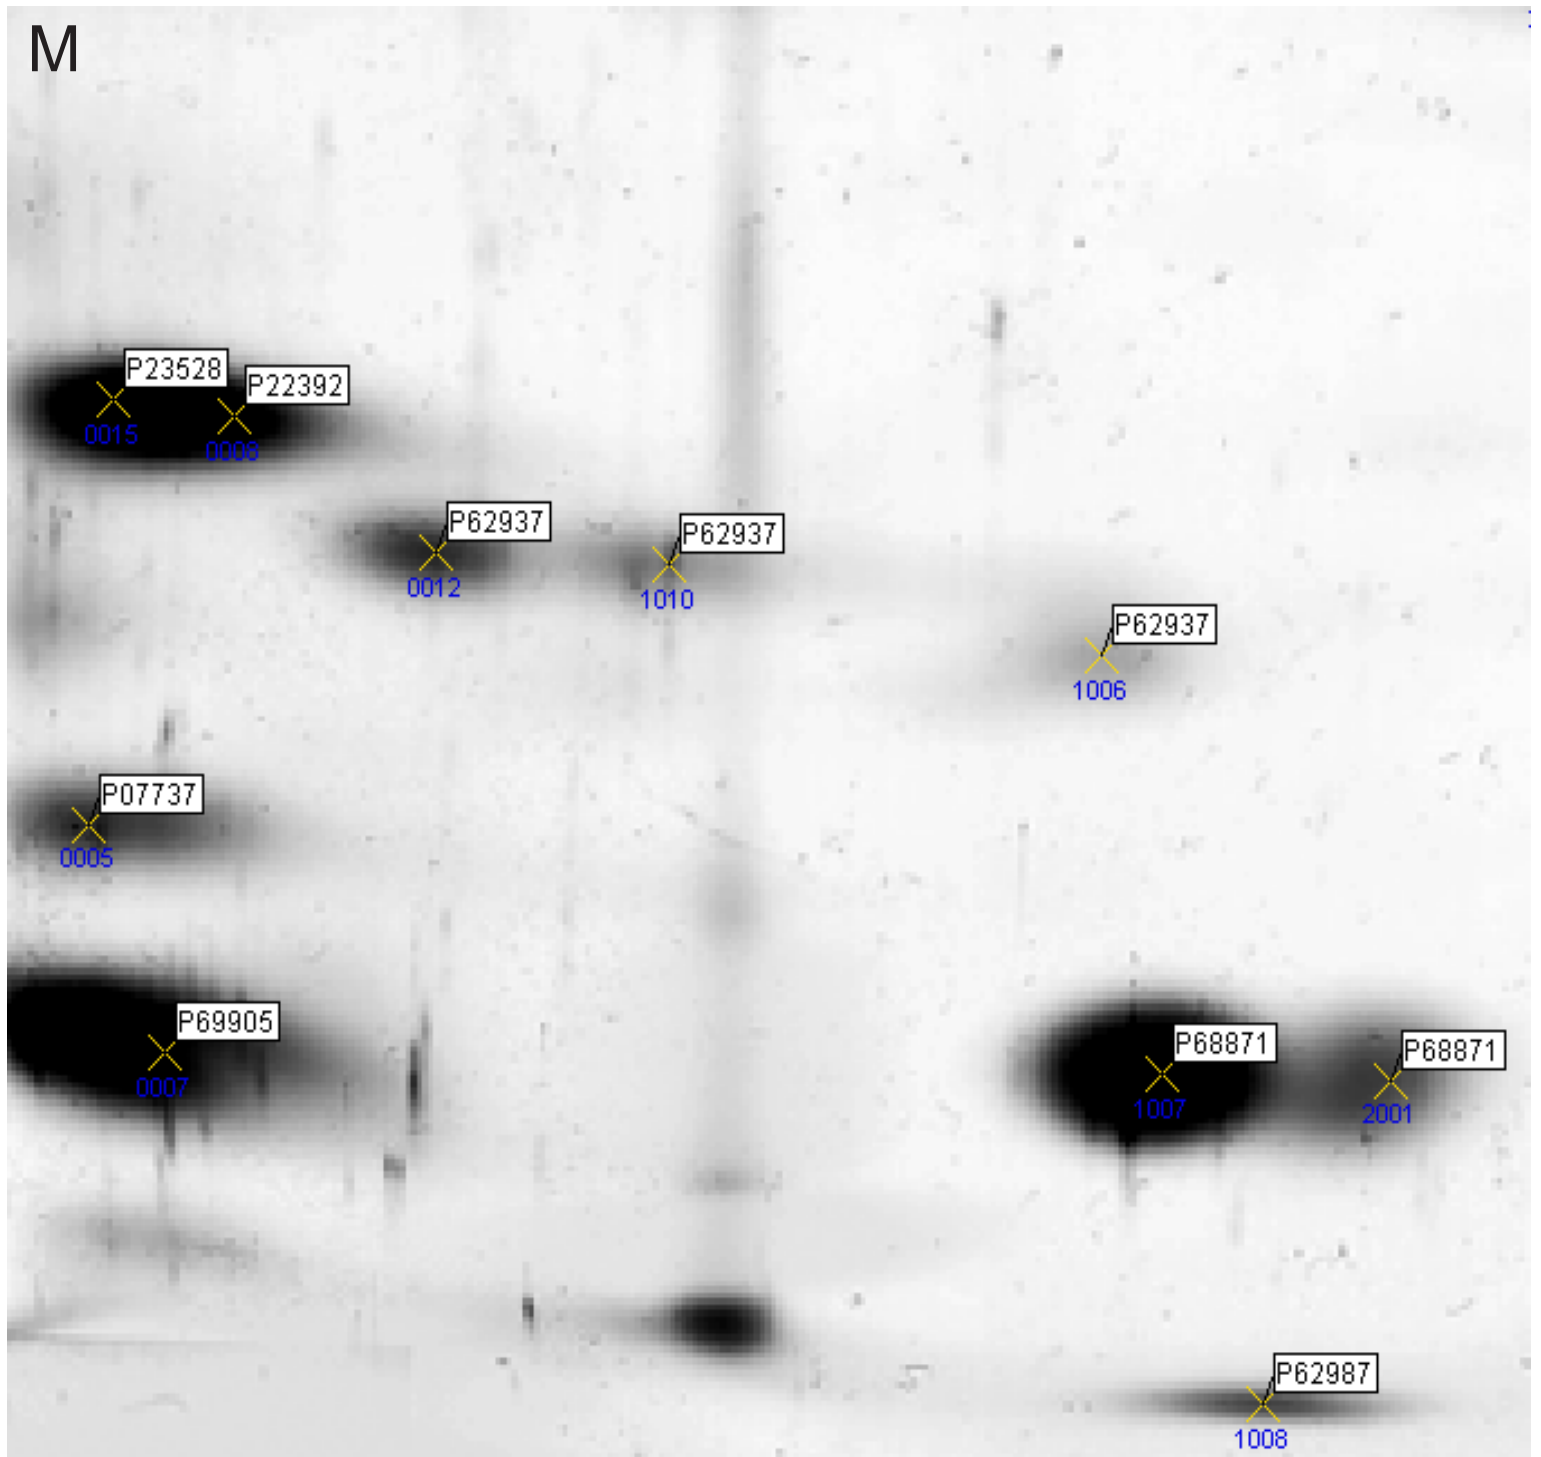

Supplement: supp_M112.019786_mcp.M112.019786-15.pdf [file supp_M112.019786_mcp.M112.019786-15.pdf]

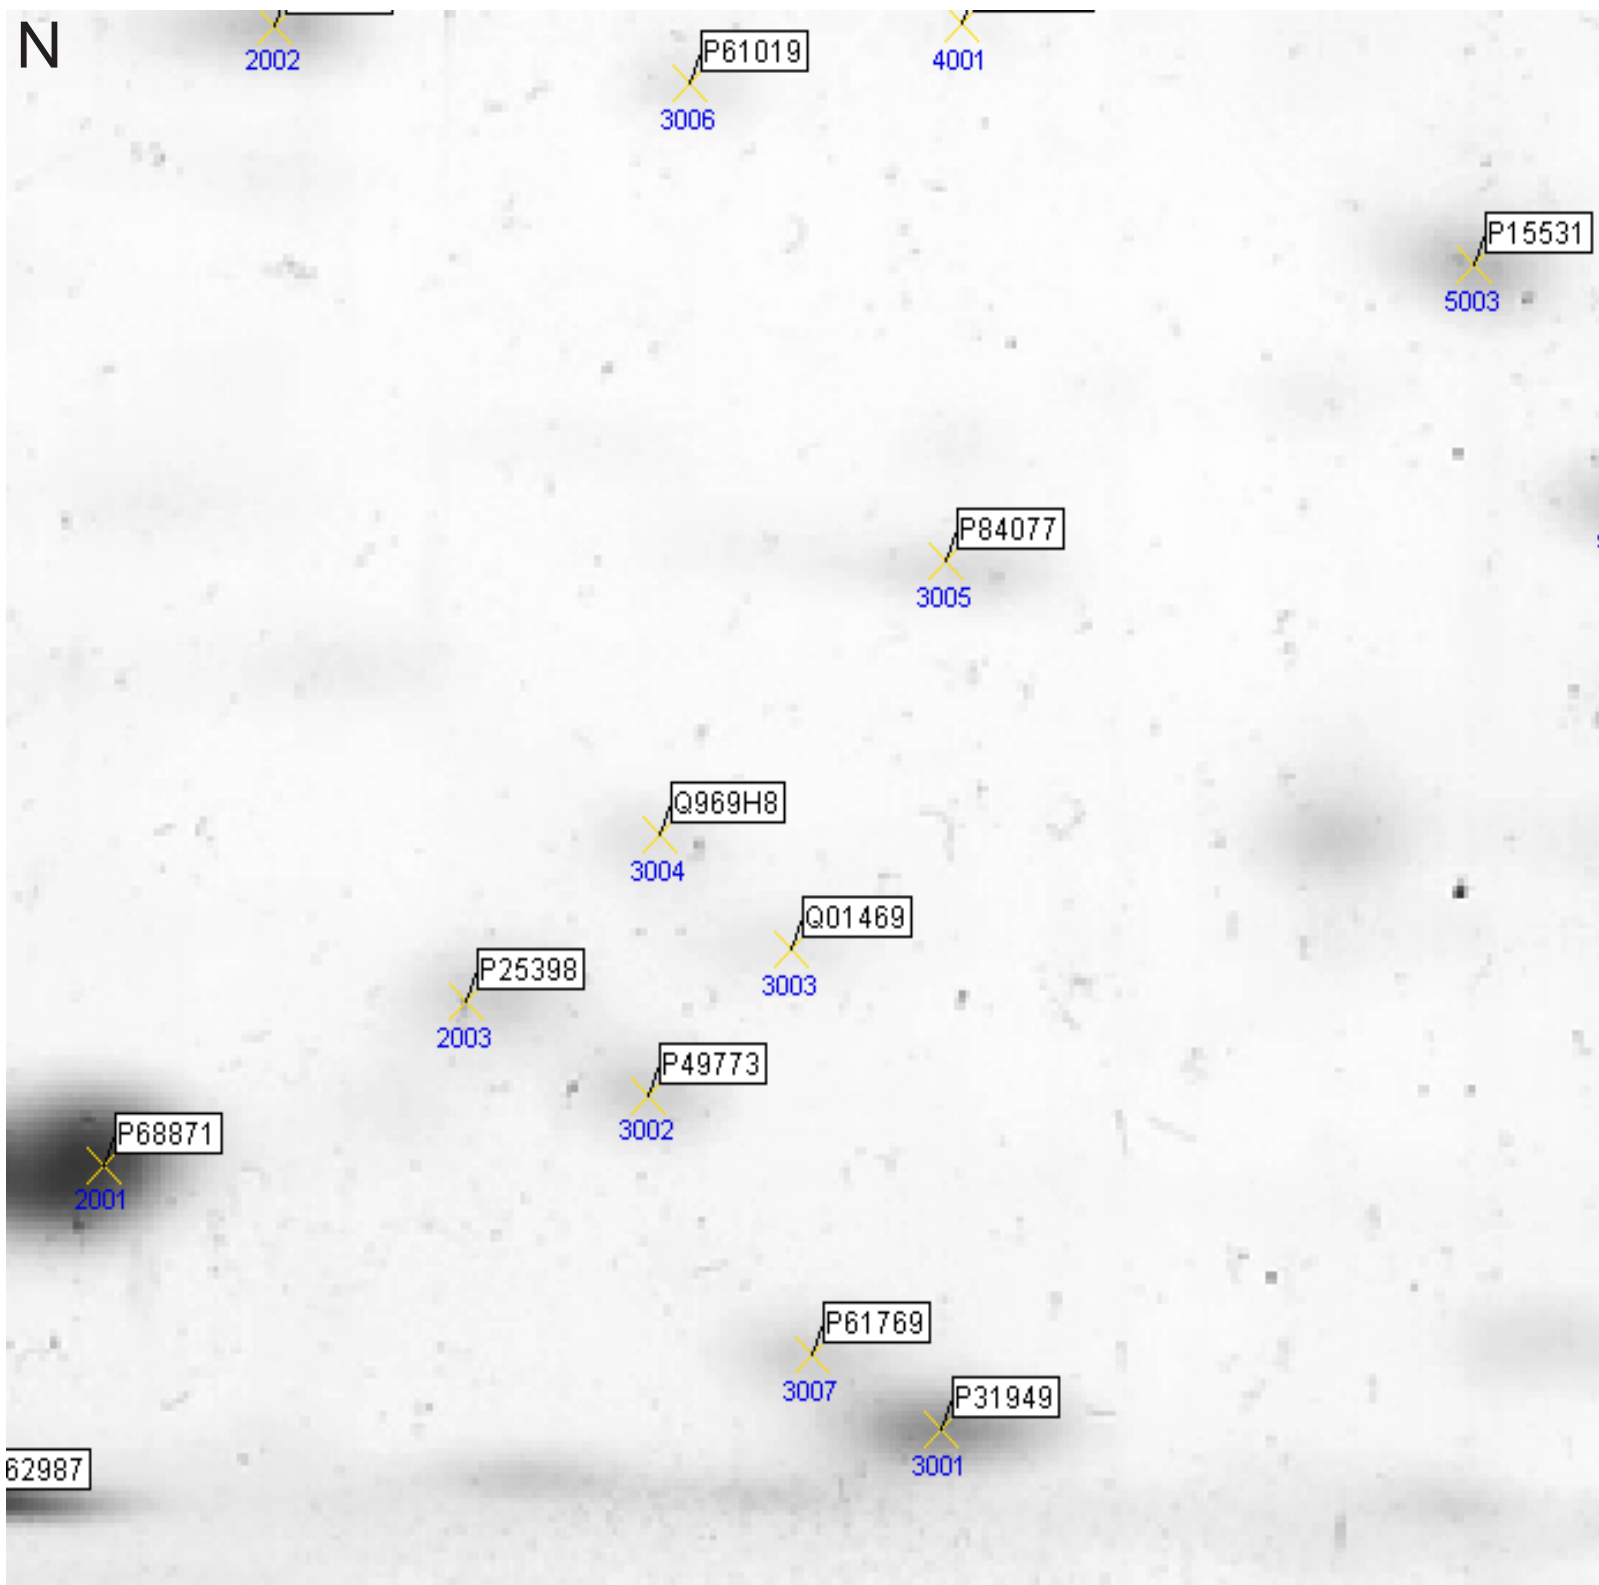

Supplement: supp_M112.019786_mcp.M112.019786-16.pdf [file supp_M112.019786_mcp.M112.019786-16.pdf]

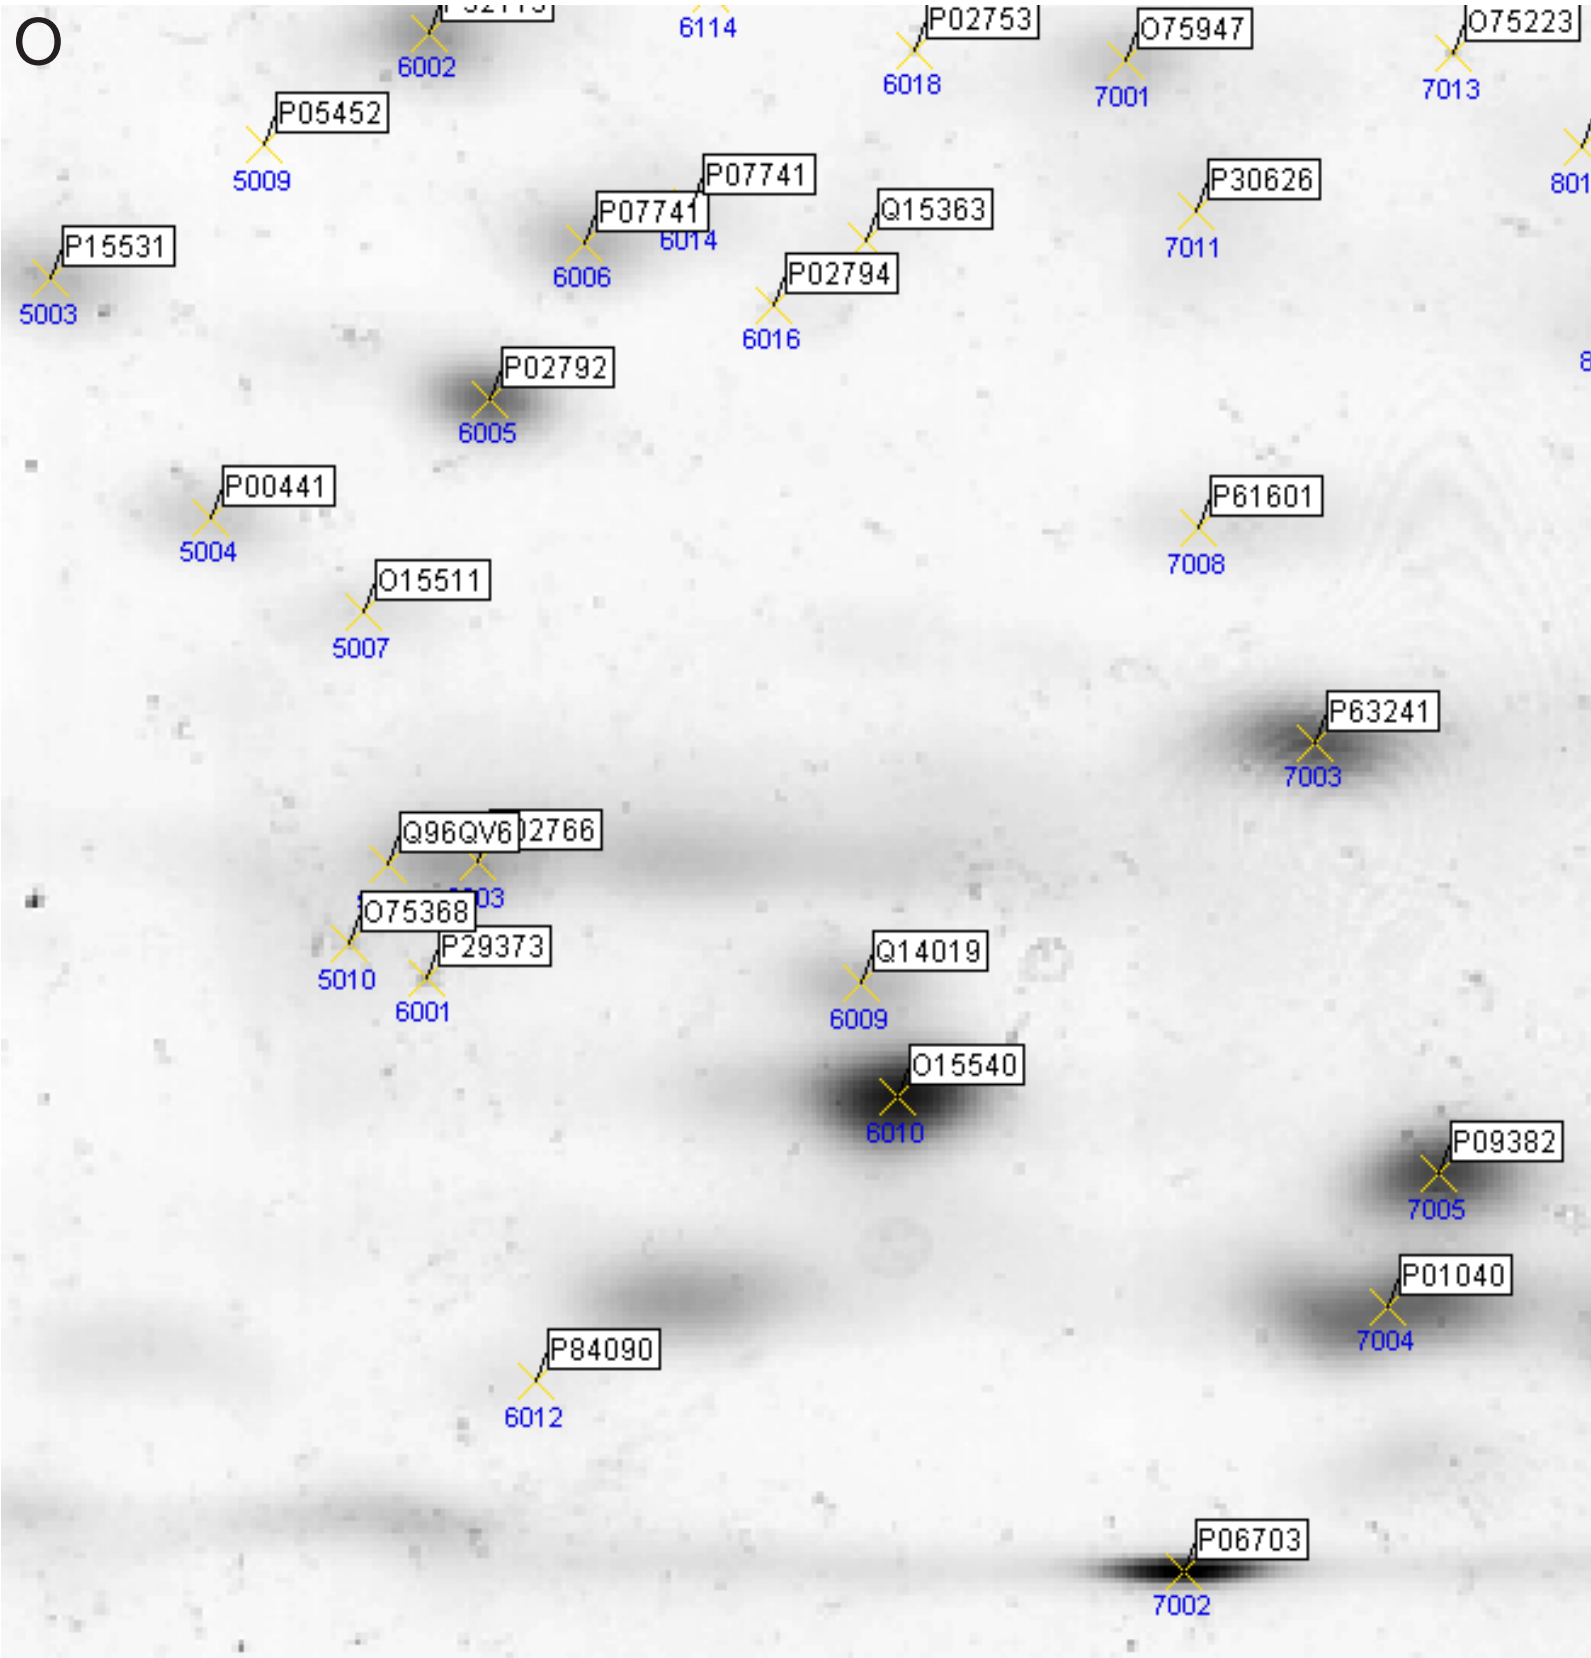

Supplement: supp_M112.019786_mcp.M112.019786-17.pdf [file supp_M112.019786_mcp.M112.019786-17.pdf]

P

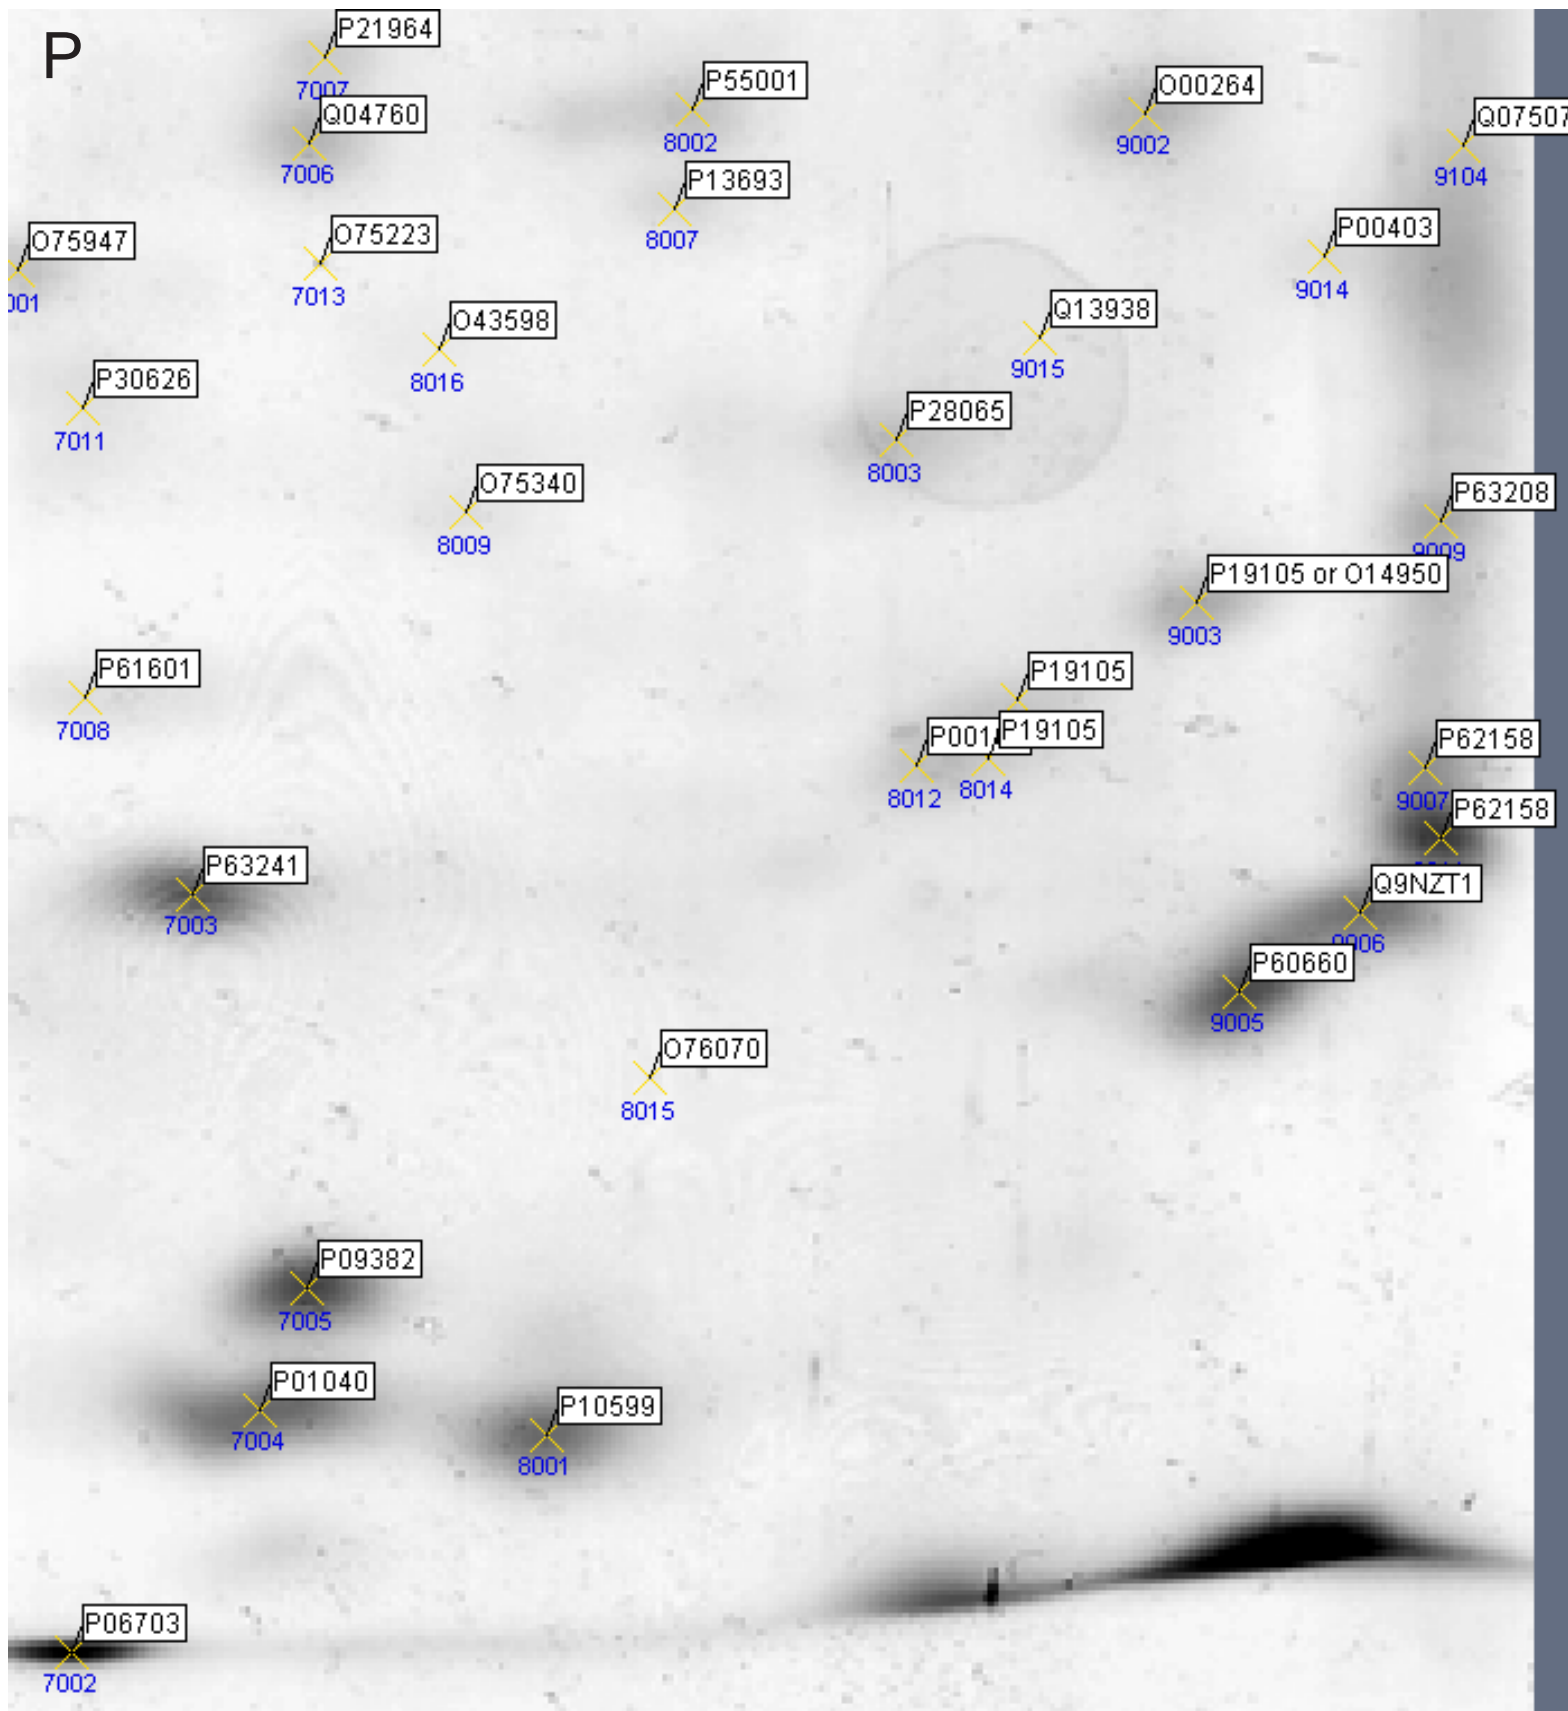

Supplement: supp_M112.019786_mcp.M112.019786-18.pdf [file supp_M112.019786_mcp.M112.019786-18.pdf]

# 2D NEPHGE

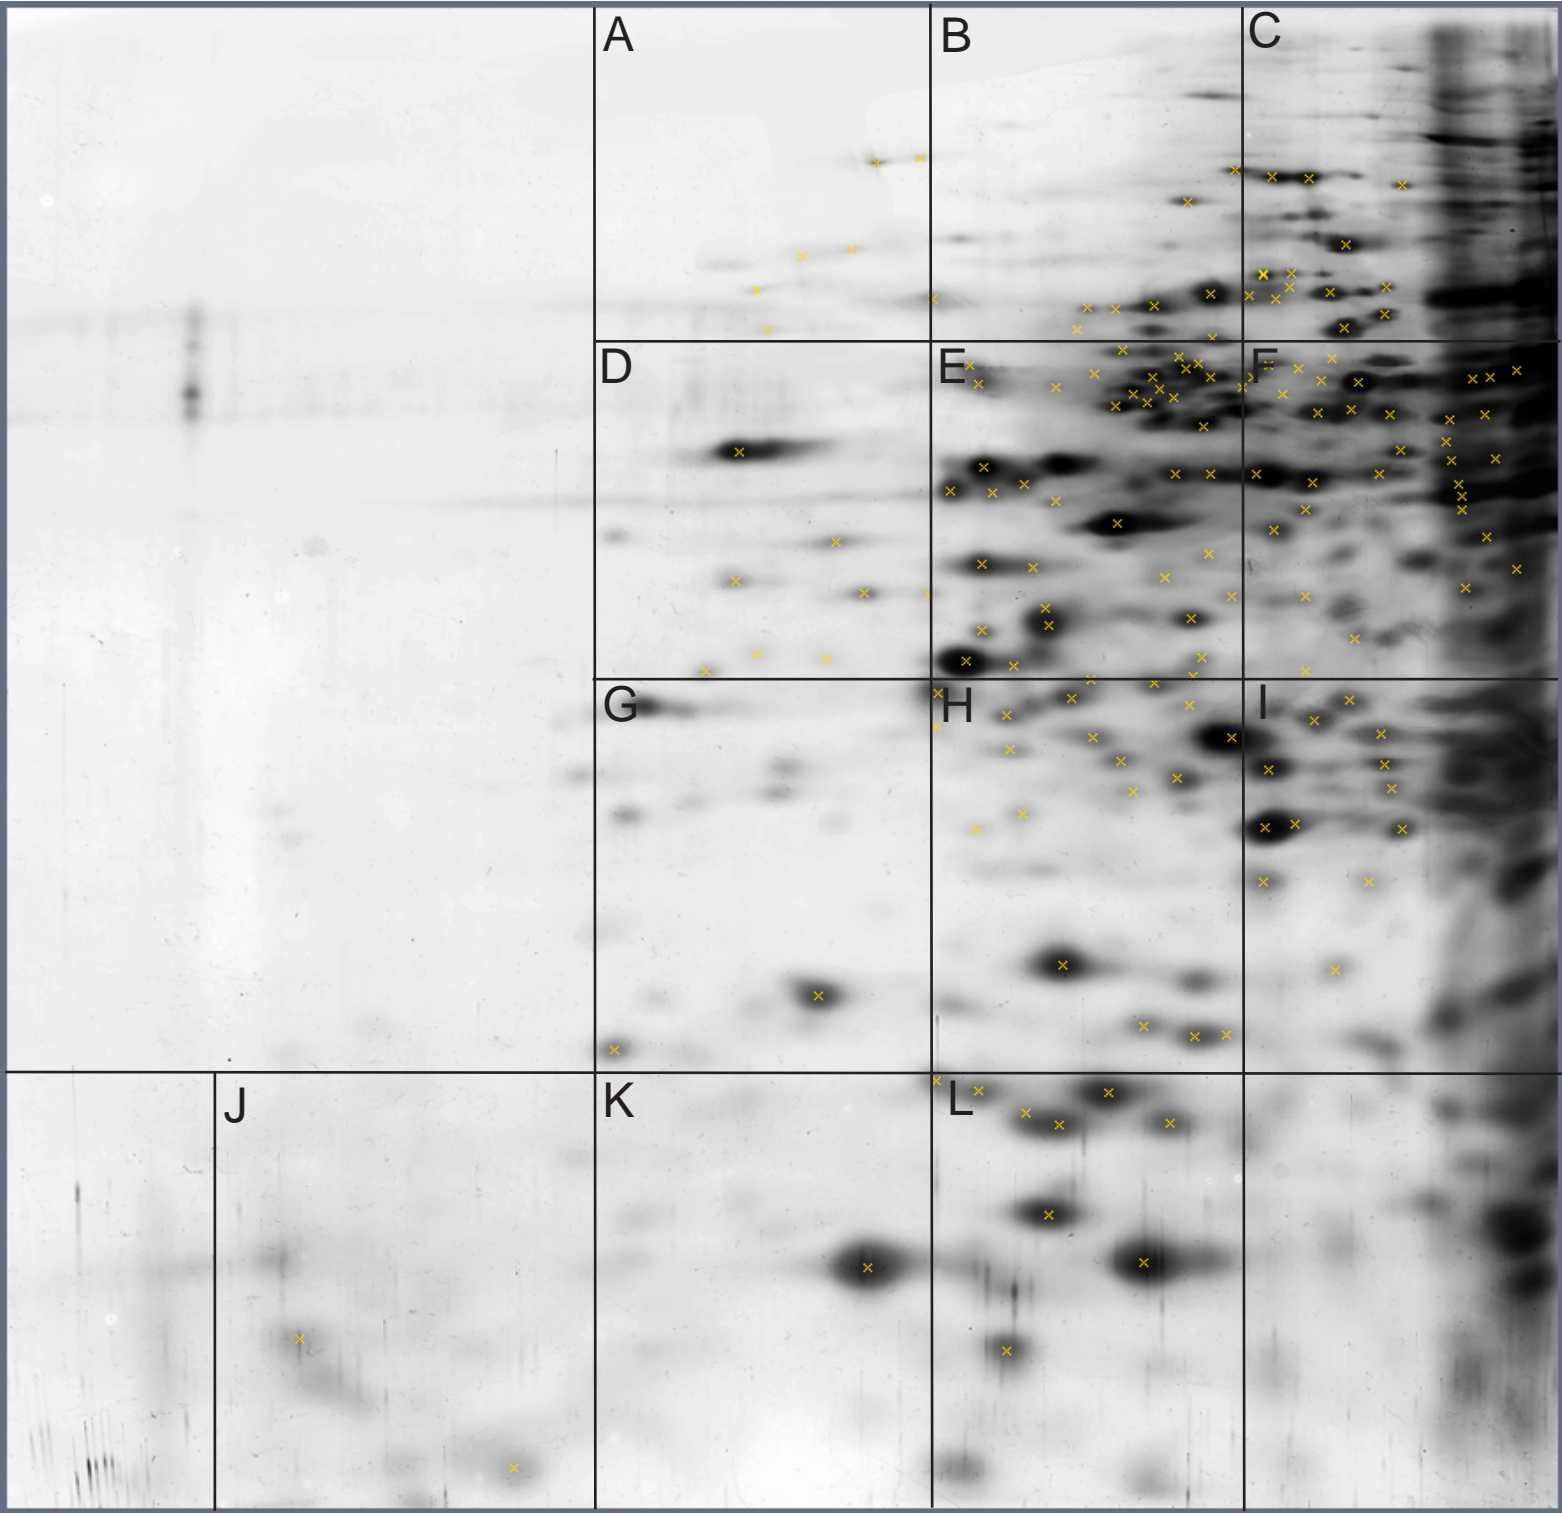

Supplement: supp_M112.019786_mcp.M112.019786-19.pdf [file supp_M112.019786_mcp.M112.019786-19.pdf]

A

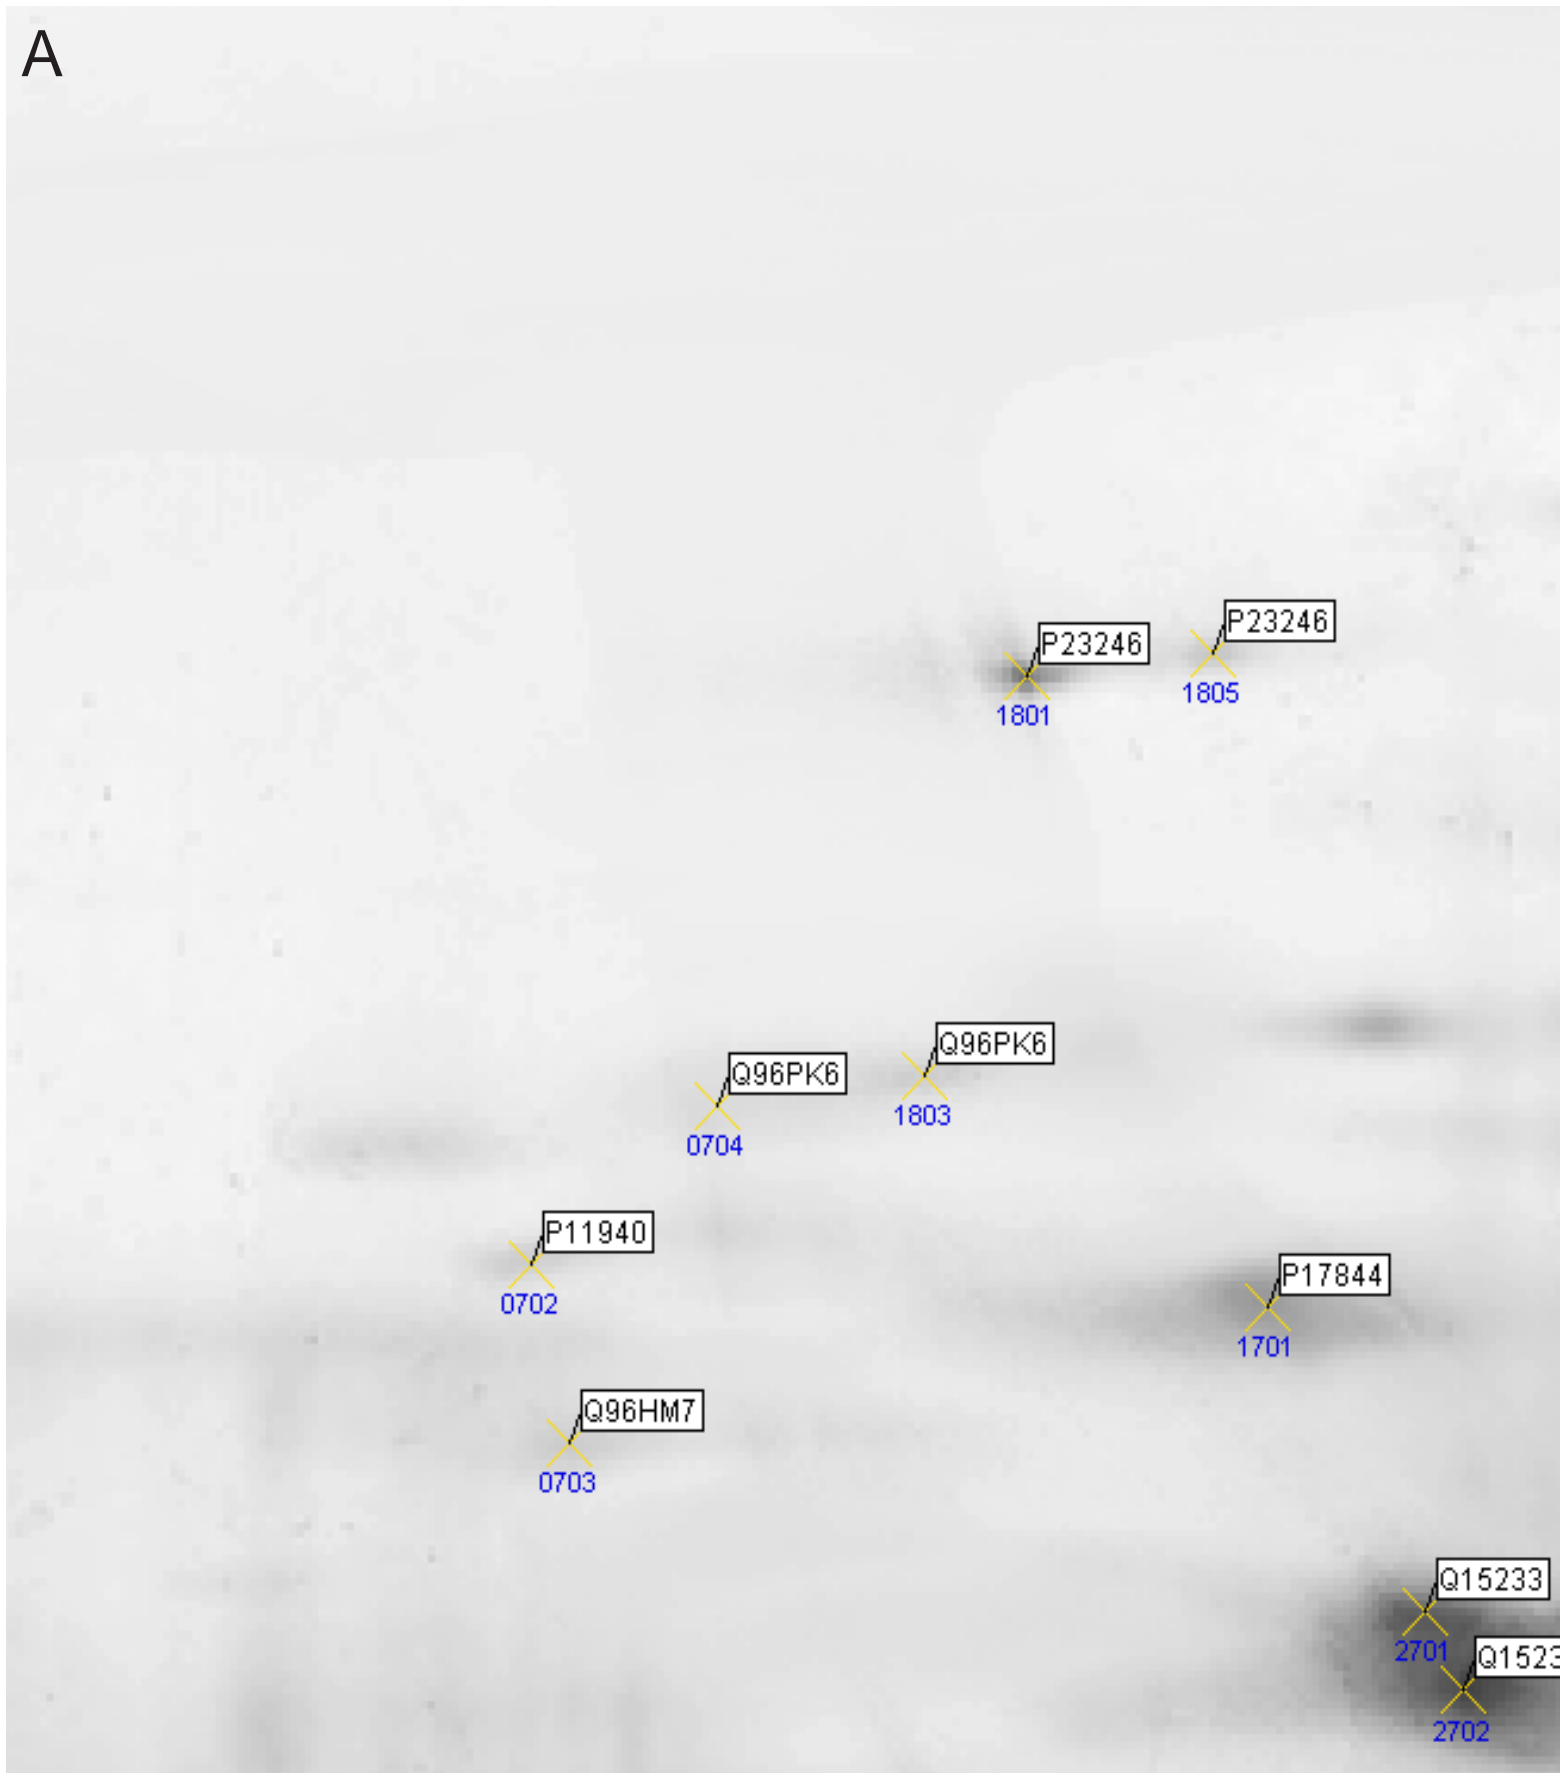

Supplement: supp_M112.019786_mcp.M112.019786-20.pdf [file supp_M112.019786_mcp.M112.019786-20.pdf]

B

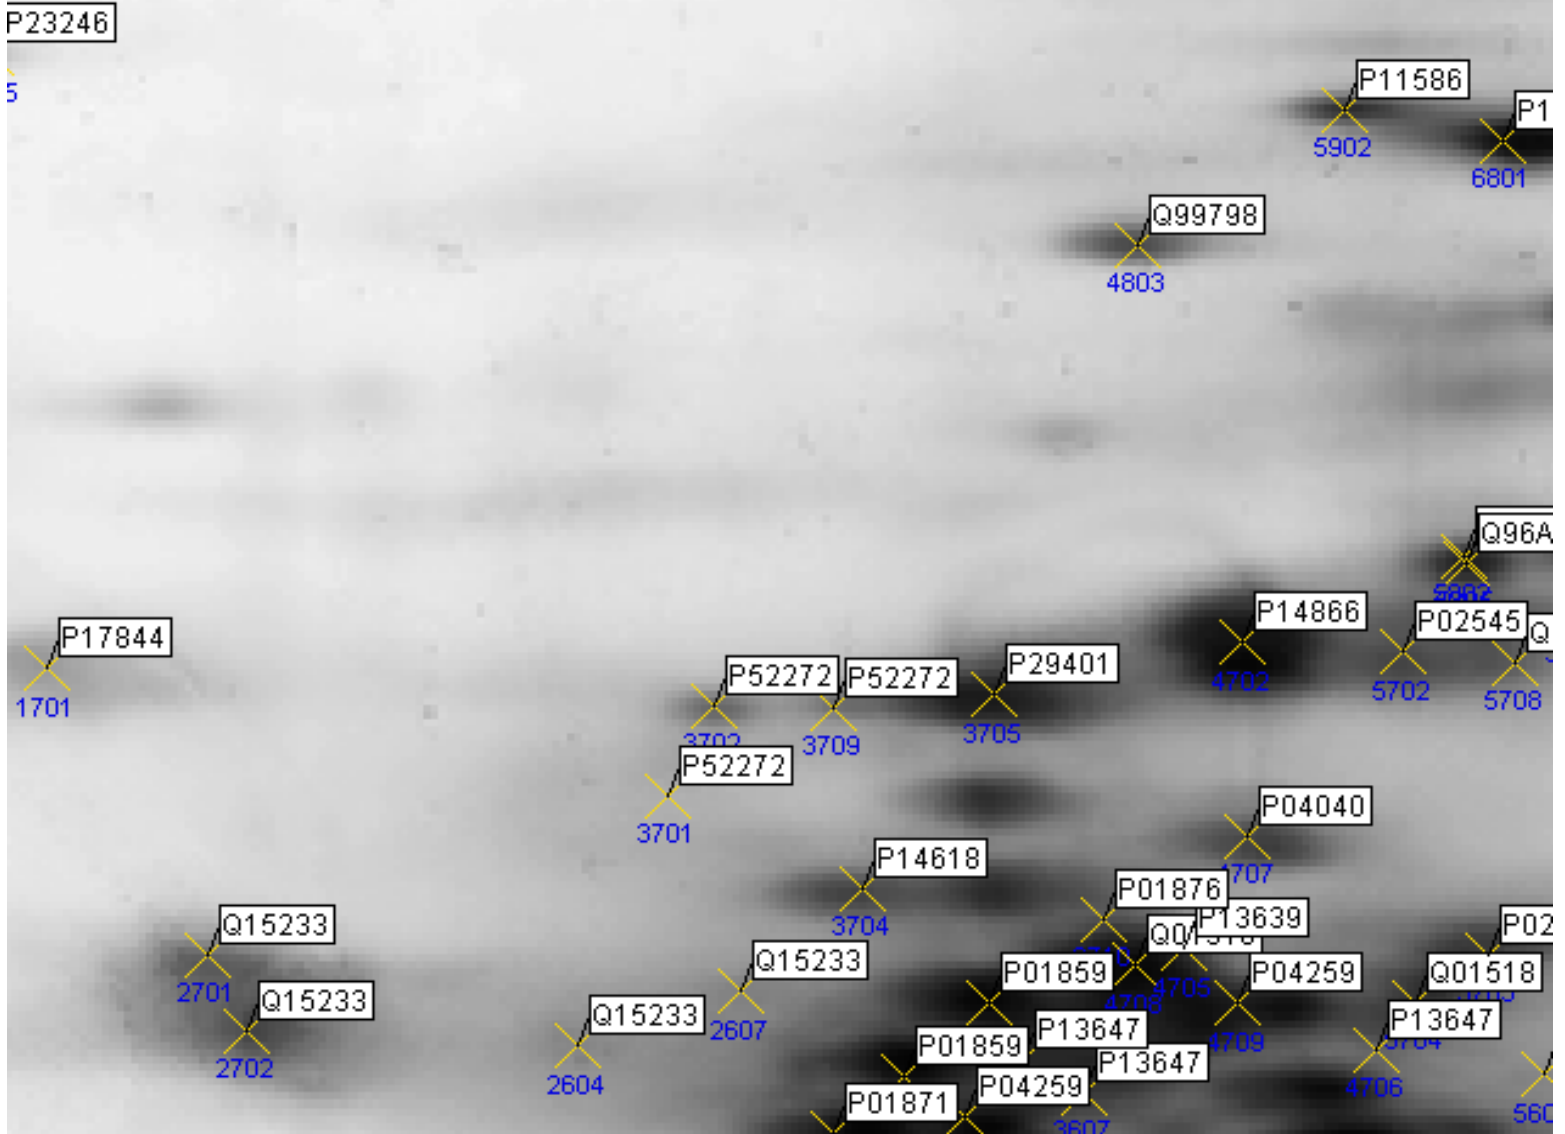

Supplement: supp_M112.019786_mcp.M112.019786-21.pdf [file supp_M112.019786_mcp.M112.019786-21.pdf]

C

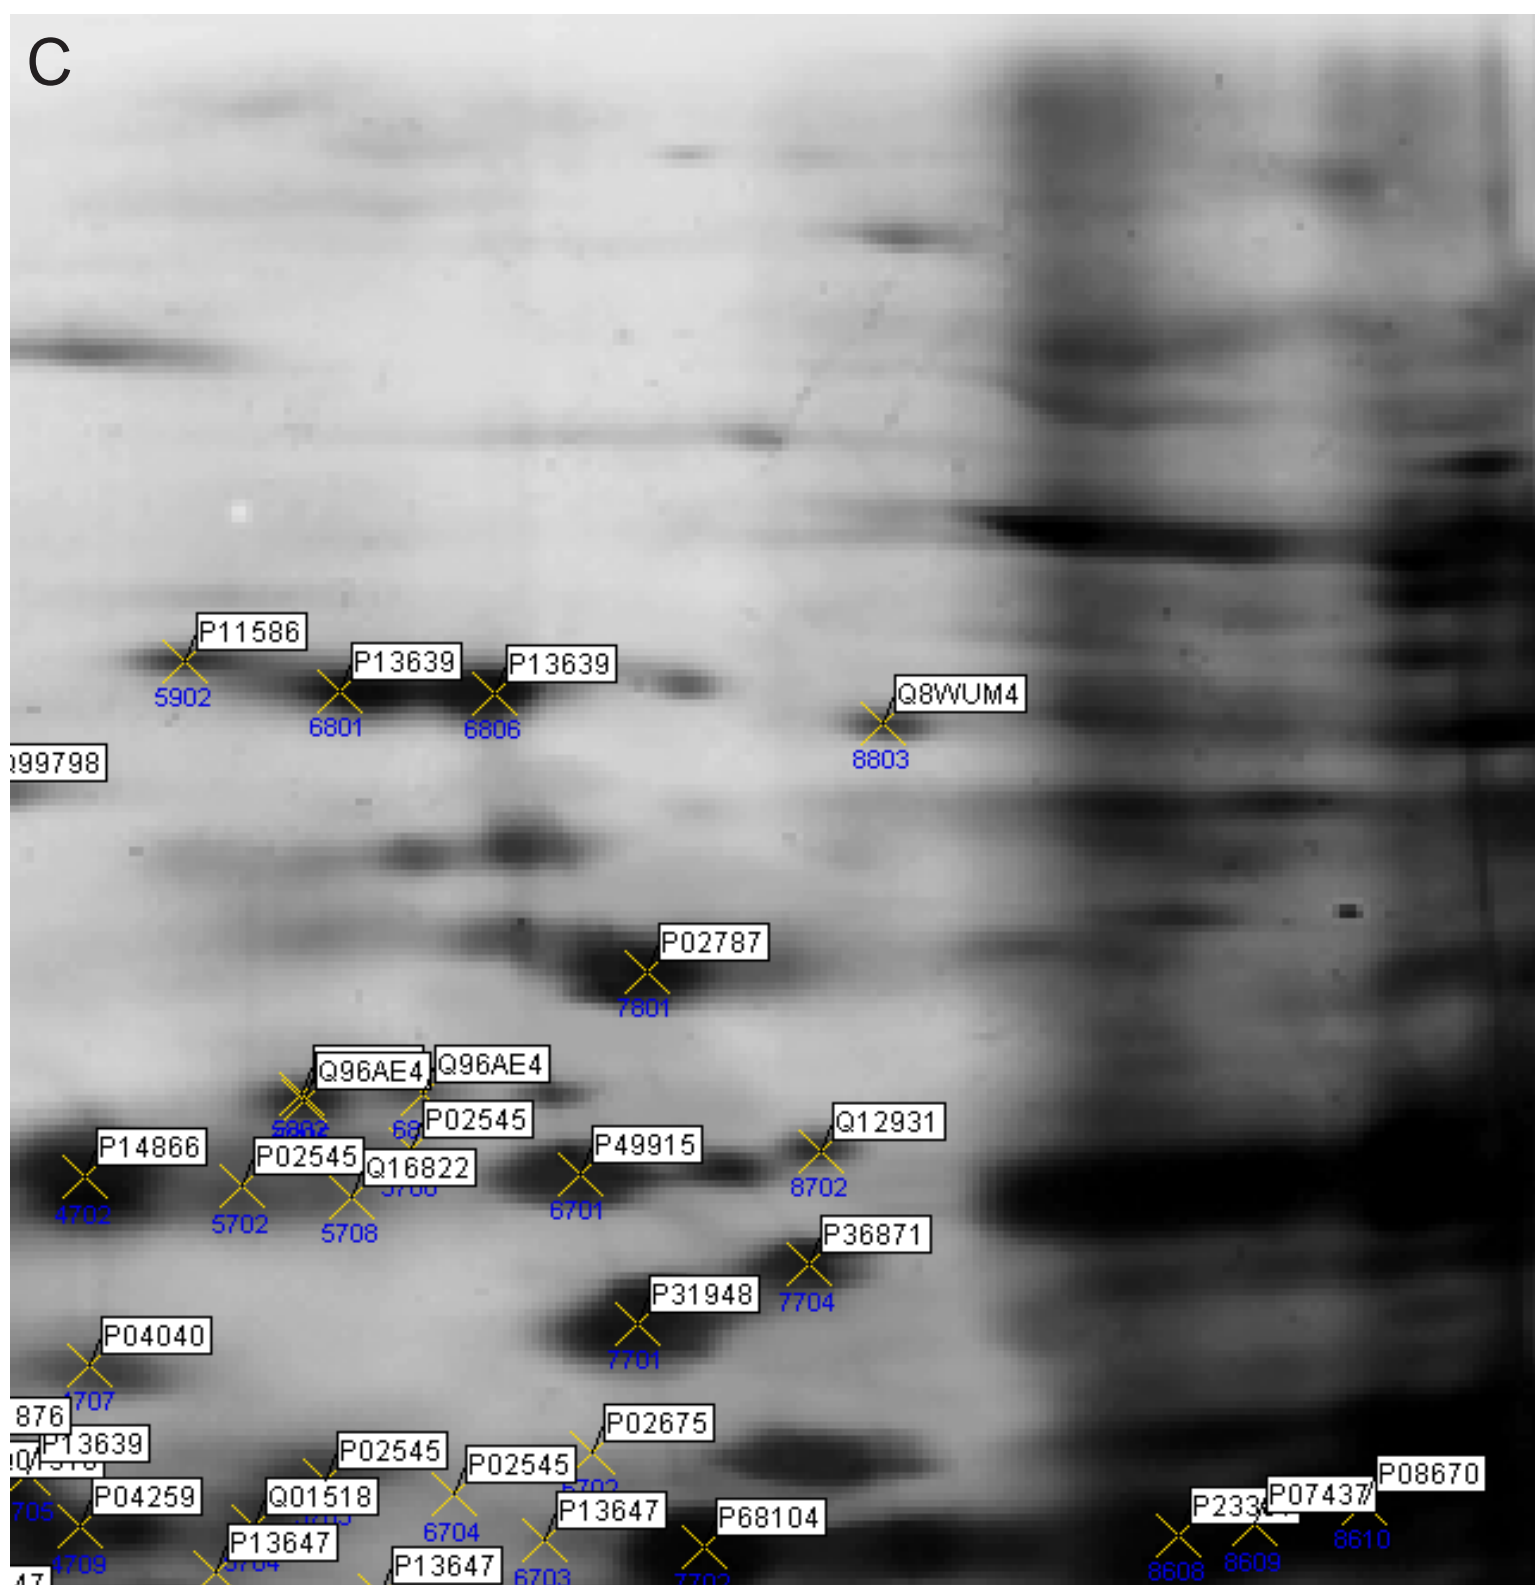

Supplement: supp_M112.019786_mcp.M112.019786-22.pdf [file supp_M112.019786_mcp.M112.019786-22.pdf]

D

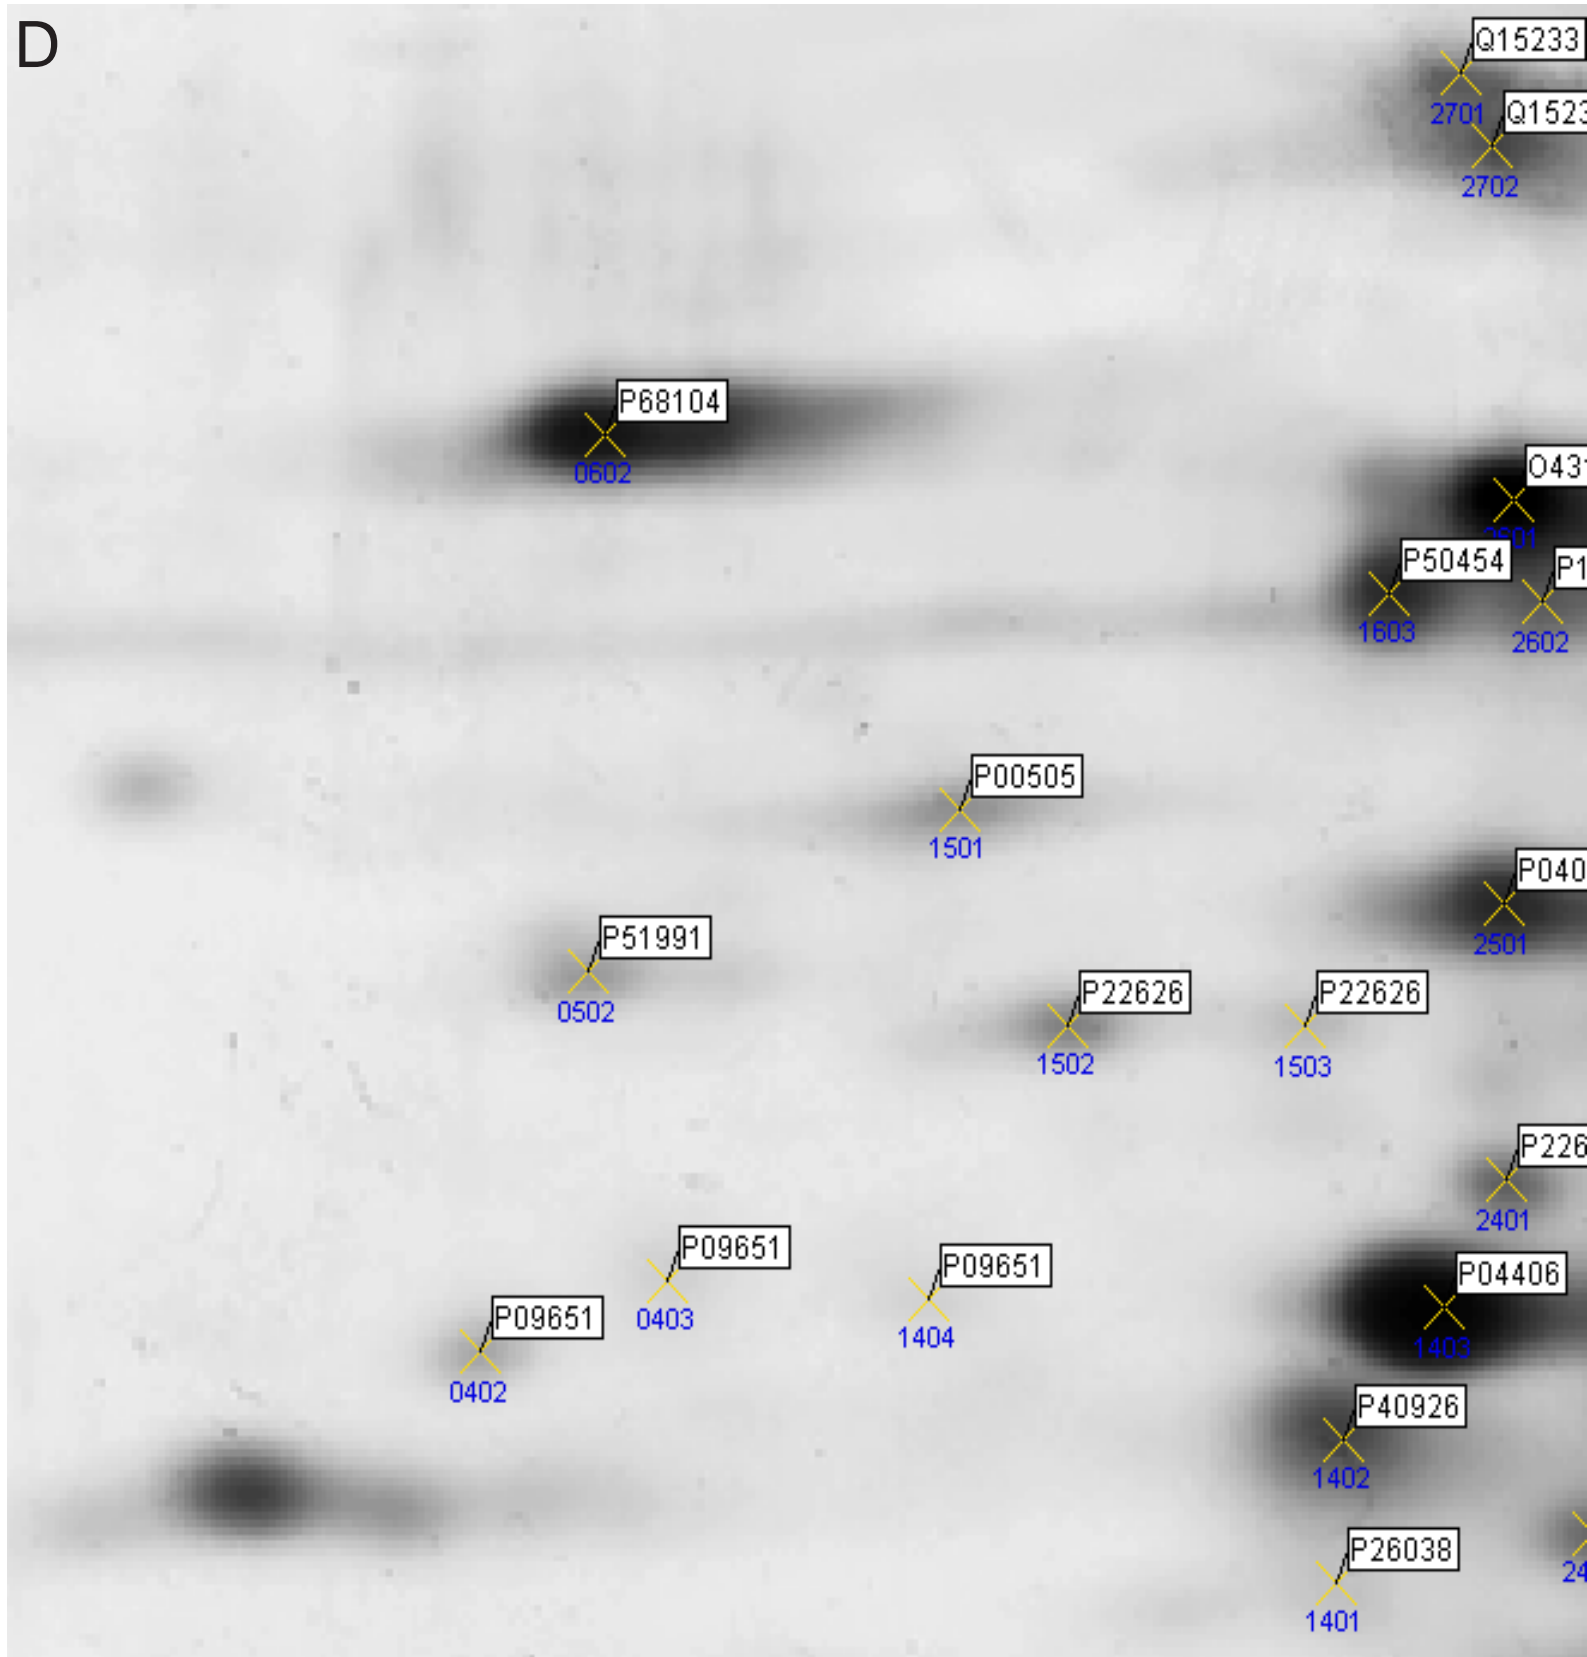

Supplement: supp_M112.019786_mcp.M112.019786-23.pdf [file supp_M112.019786_mcp.M112.019786-23.pdf]

E

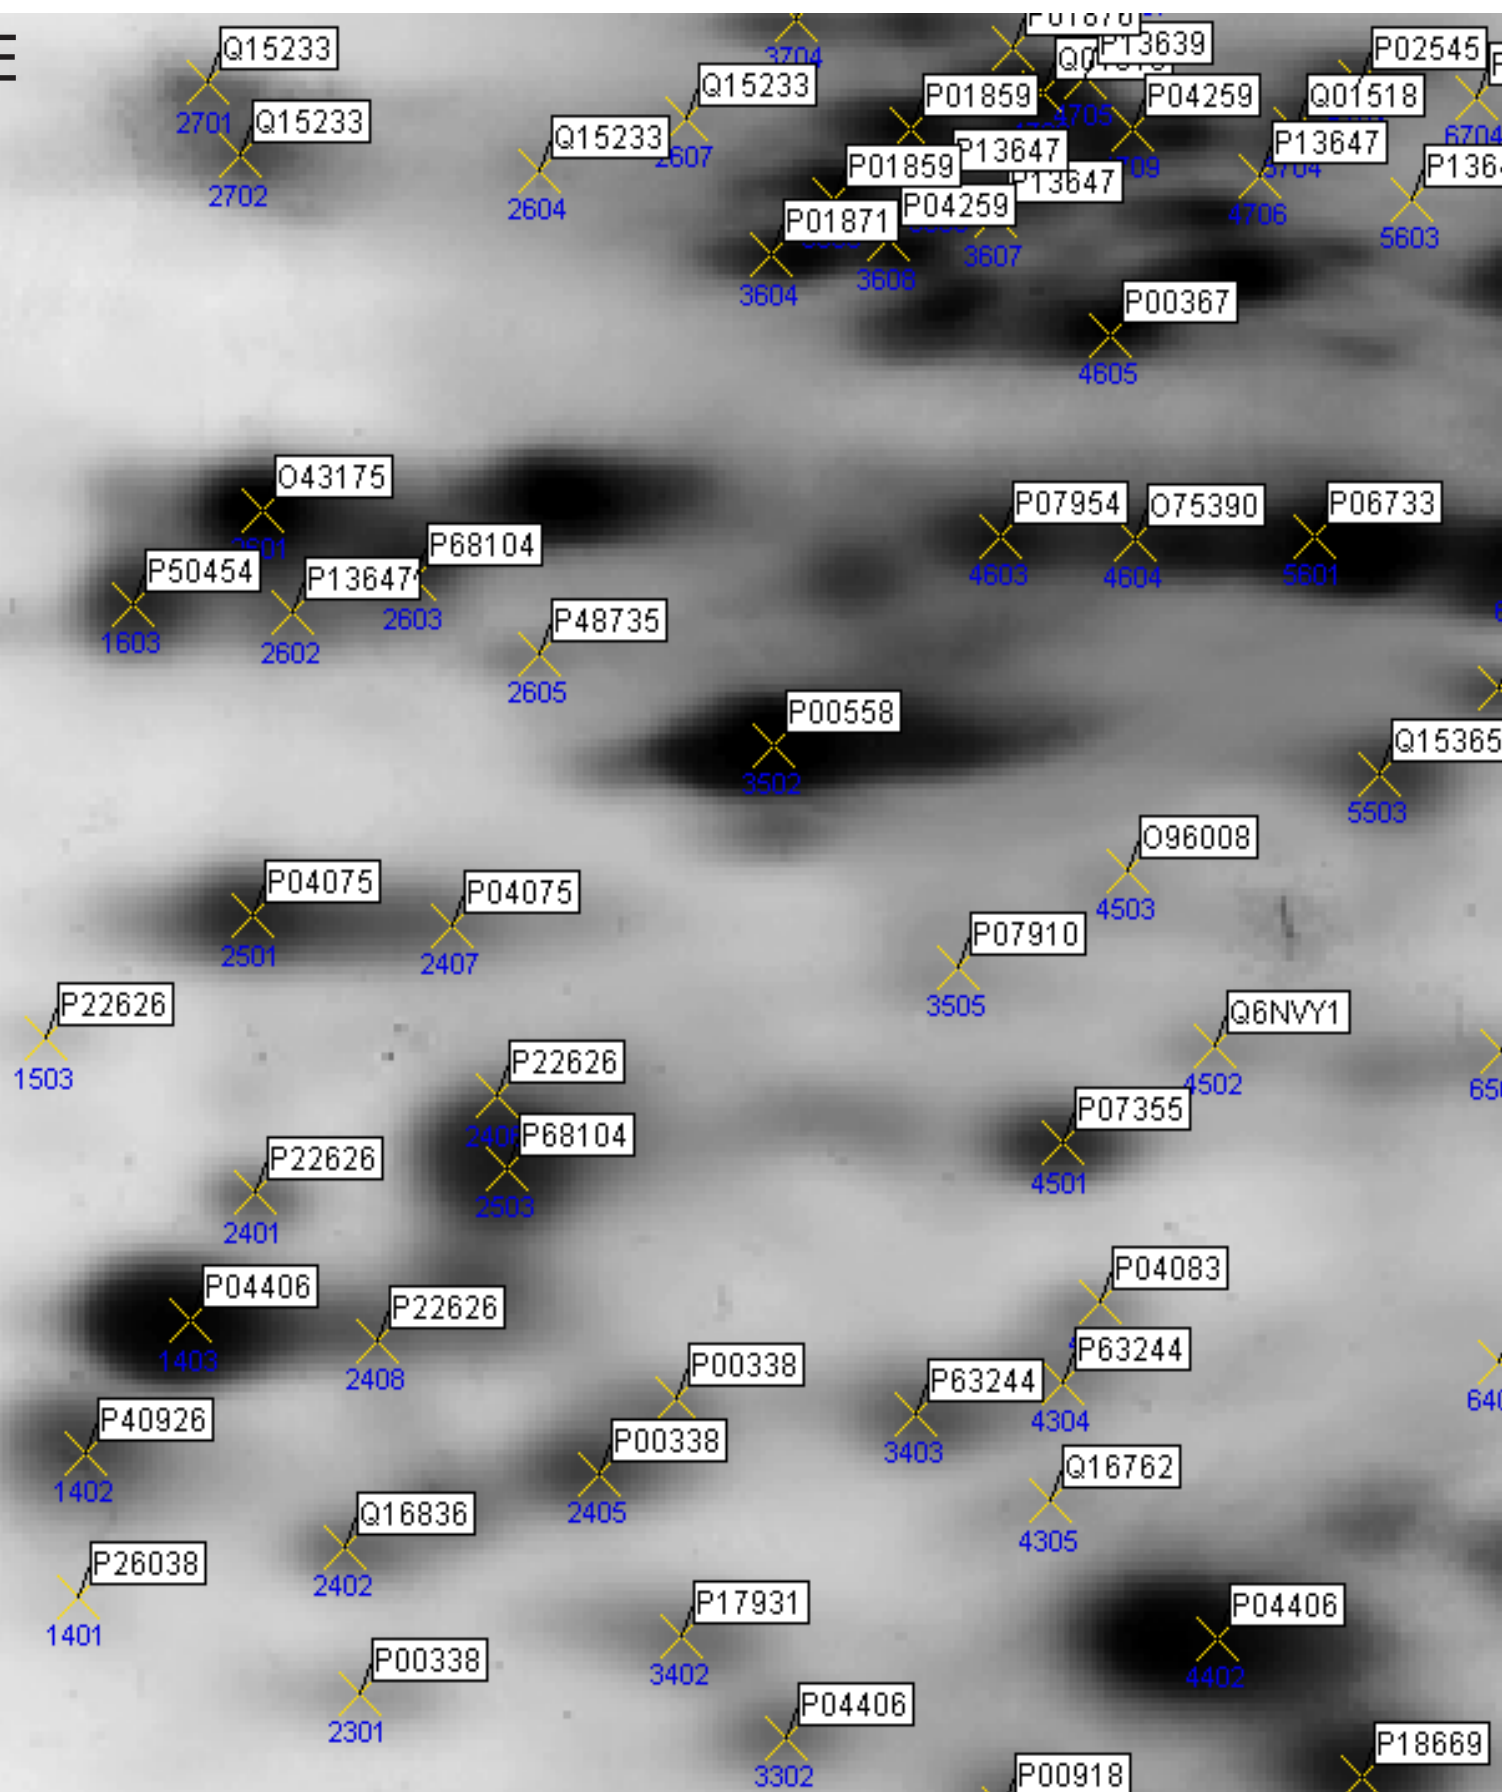

Supplement: supp_M112.019786_mcp.M112.019786-24.pdf [file supp_M112.019786_mcp.M112.019786-24.pdf]

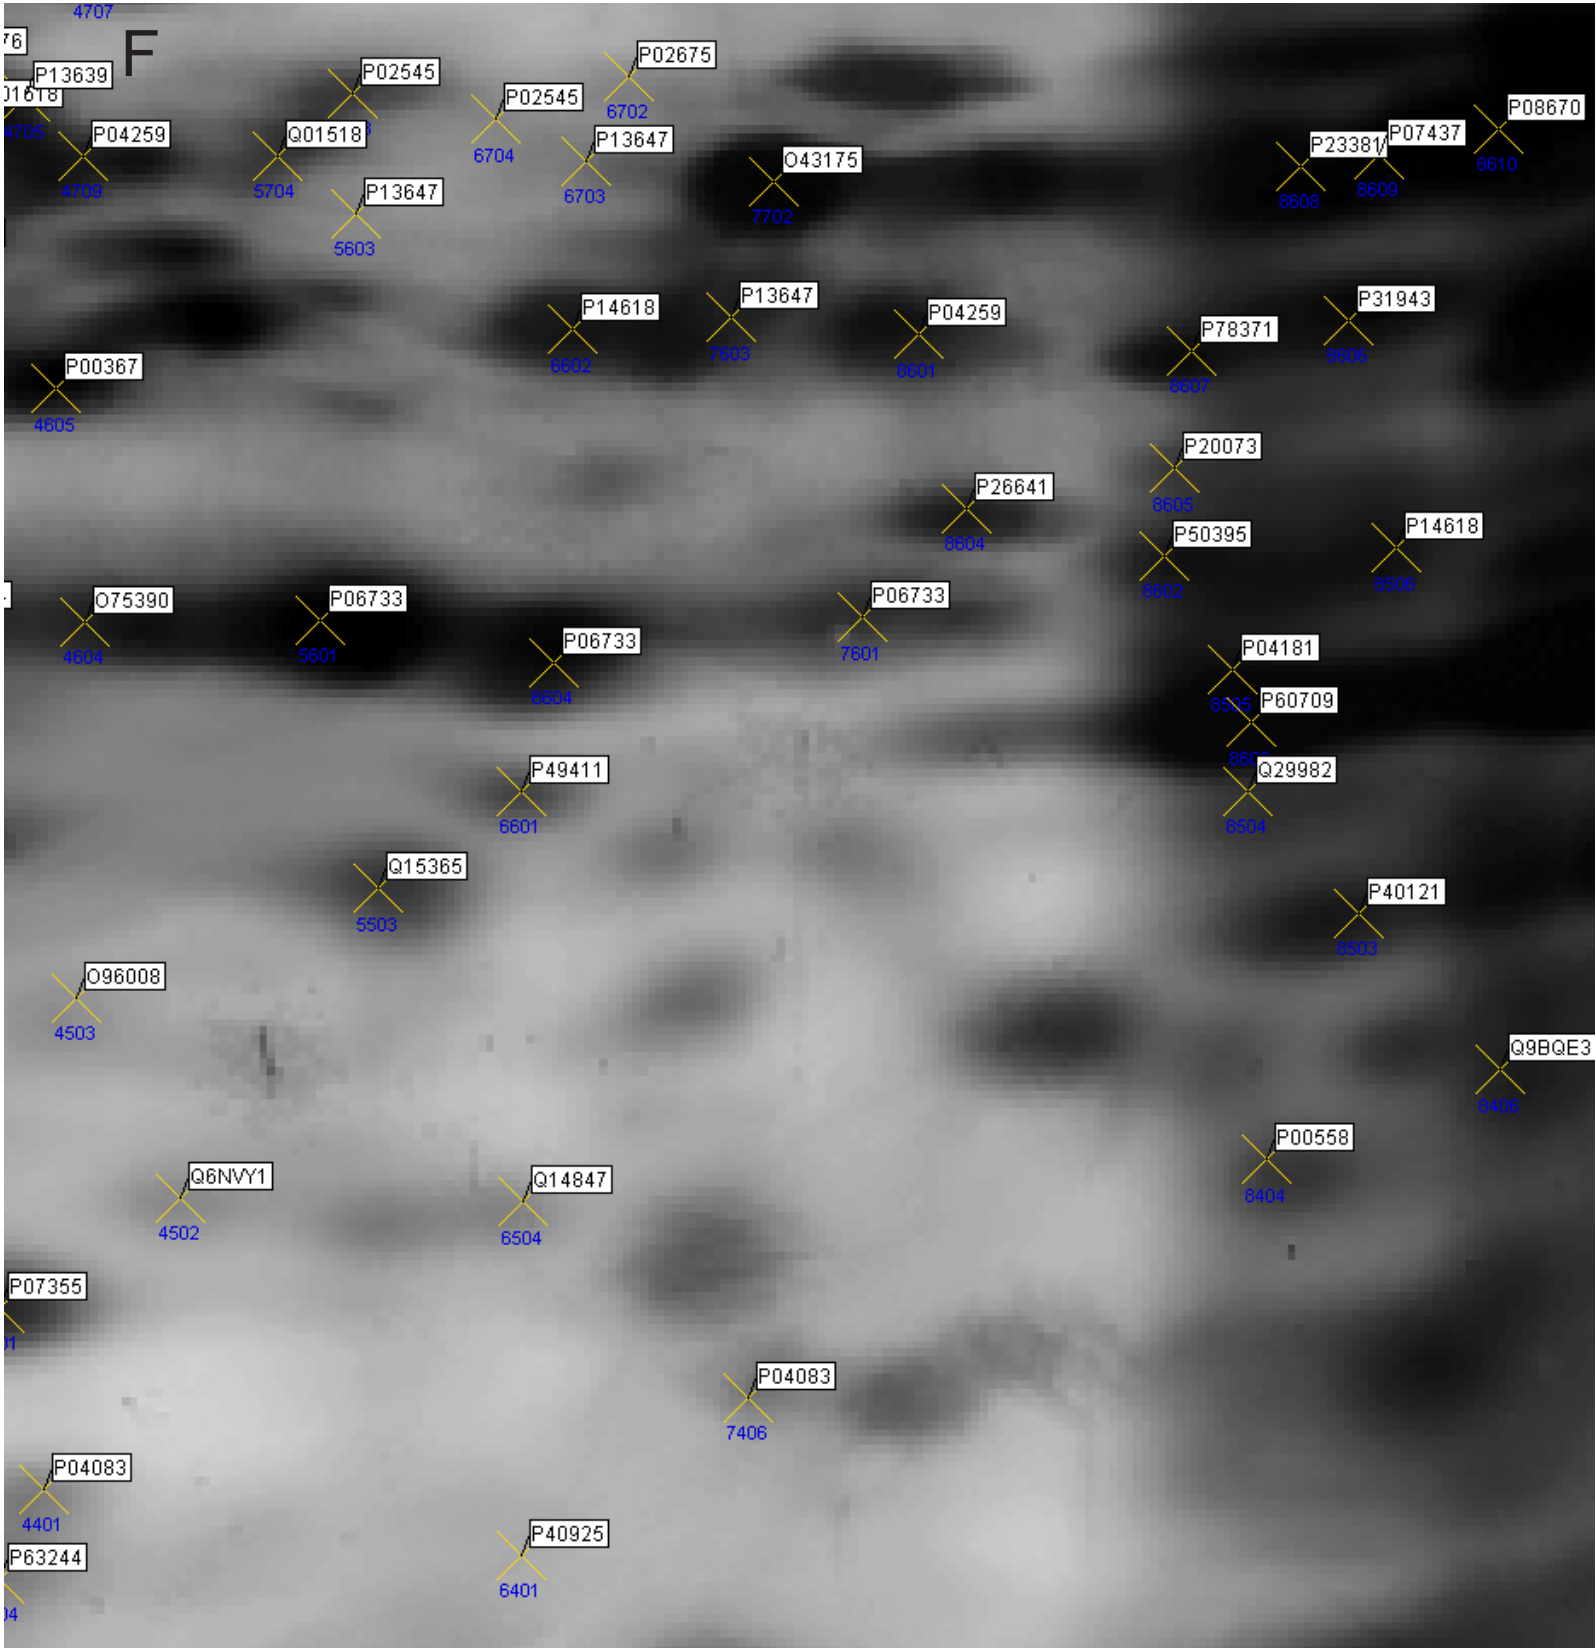

Supplement: supp_M112.019786_mcp.M112.019786-25.pdf [file supp_M112.019786_mcp.M112.019786-25.pdf]

G

0402

P40926

1402

P26038

1401

Q96MZ4

1202

P23284

0201

Q9GZX7

1203

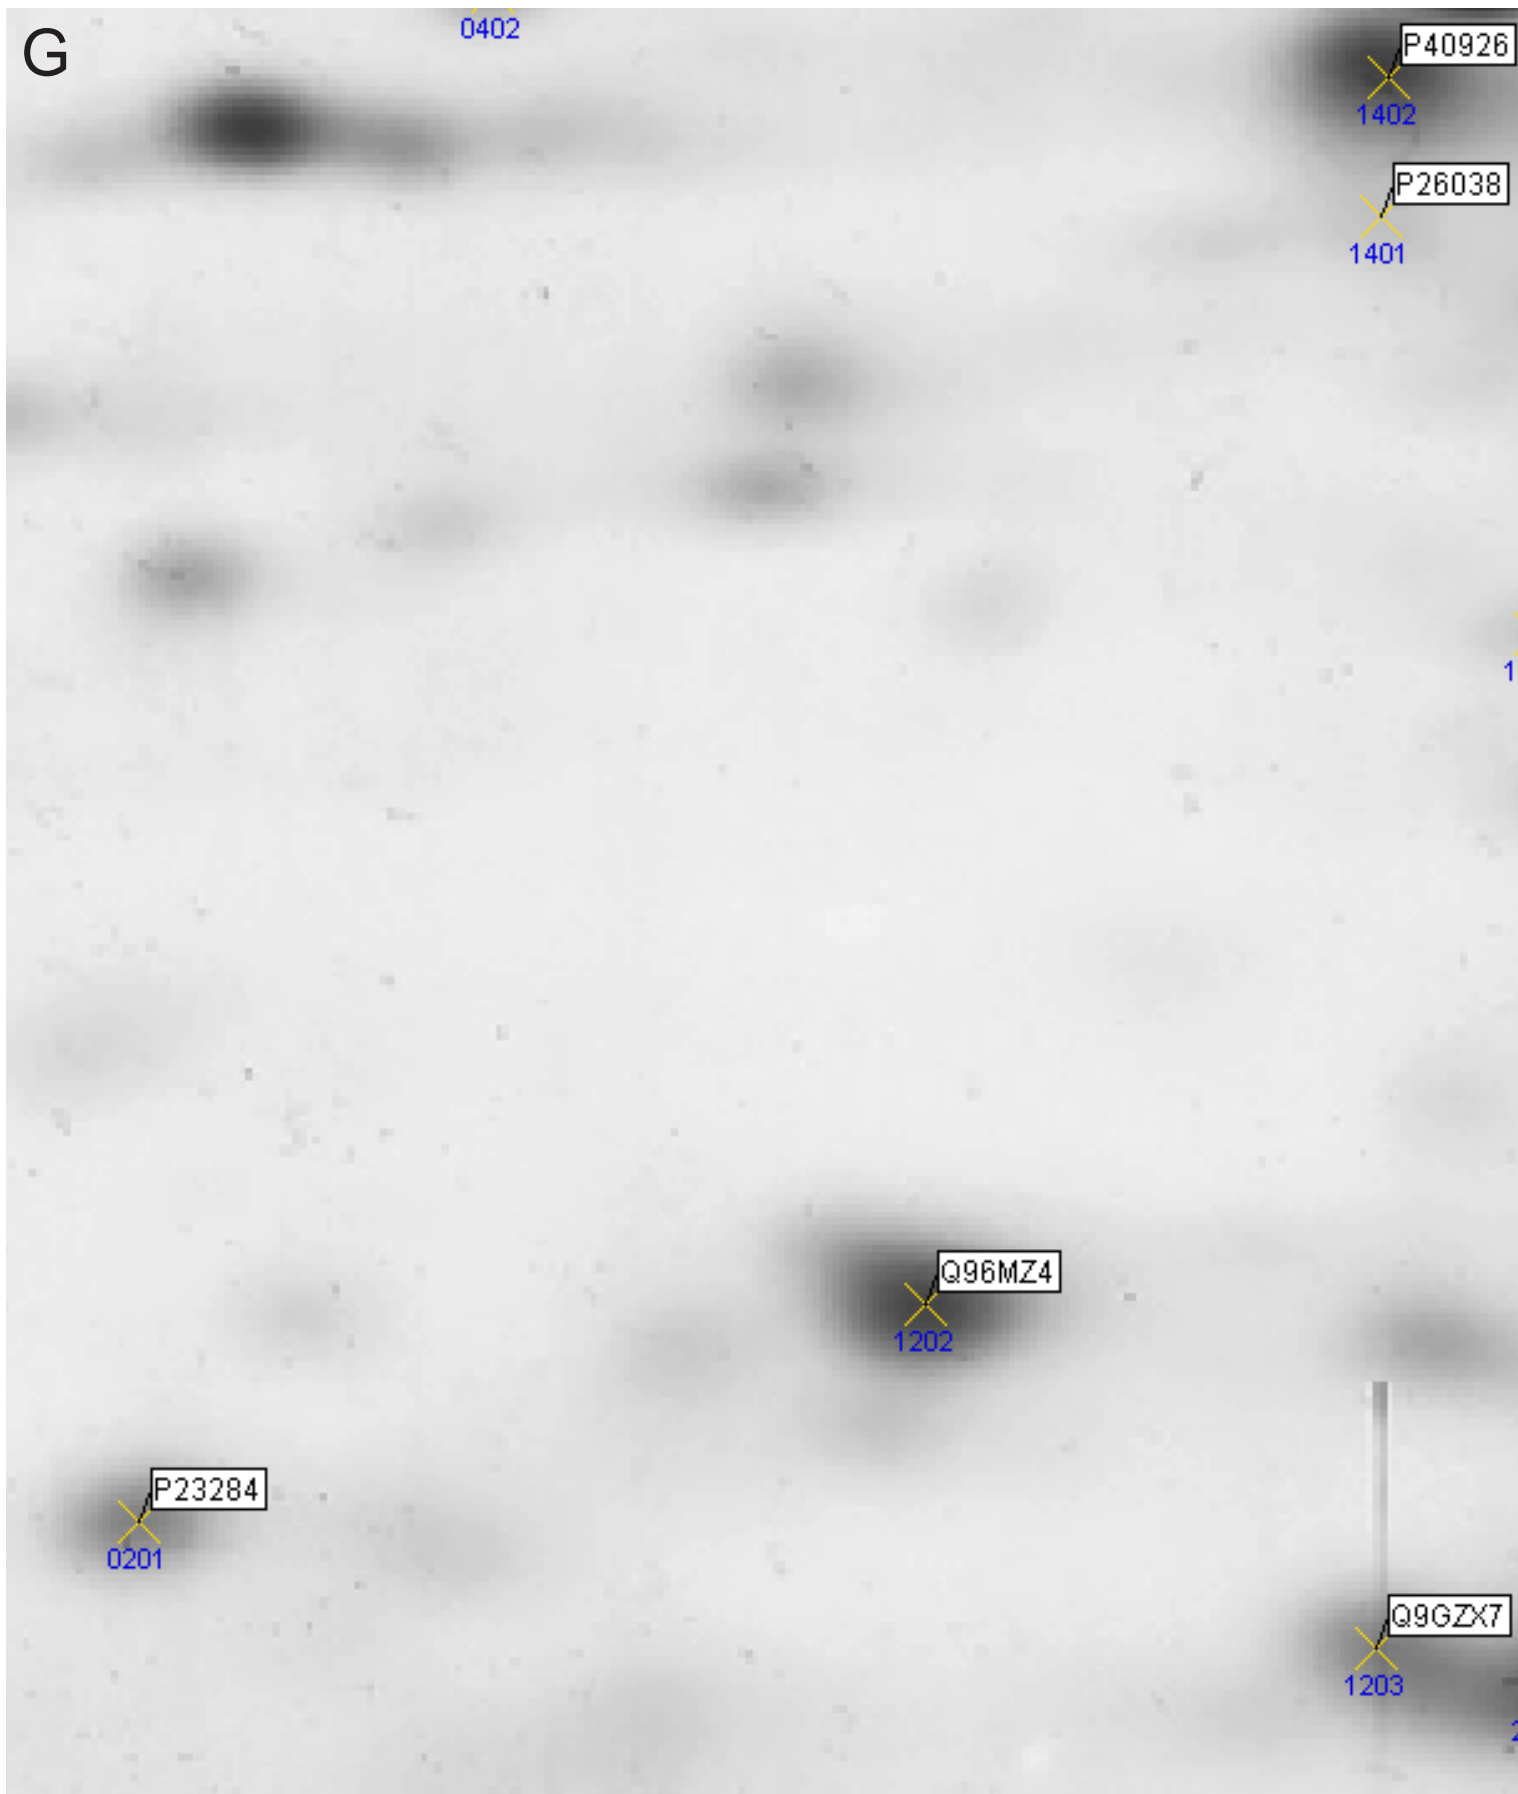

Supplement: supp_M112.019786_mcp.M112.019786-26.pdf [file supp_M112.019786_mcp.M112.019786-26.pdf]

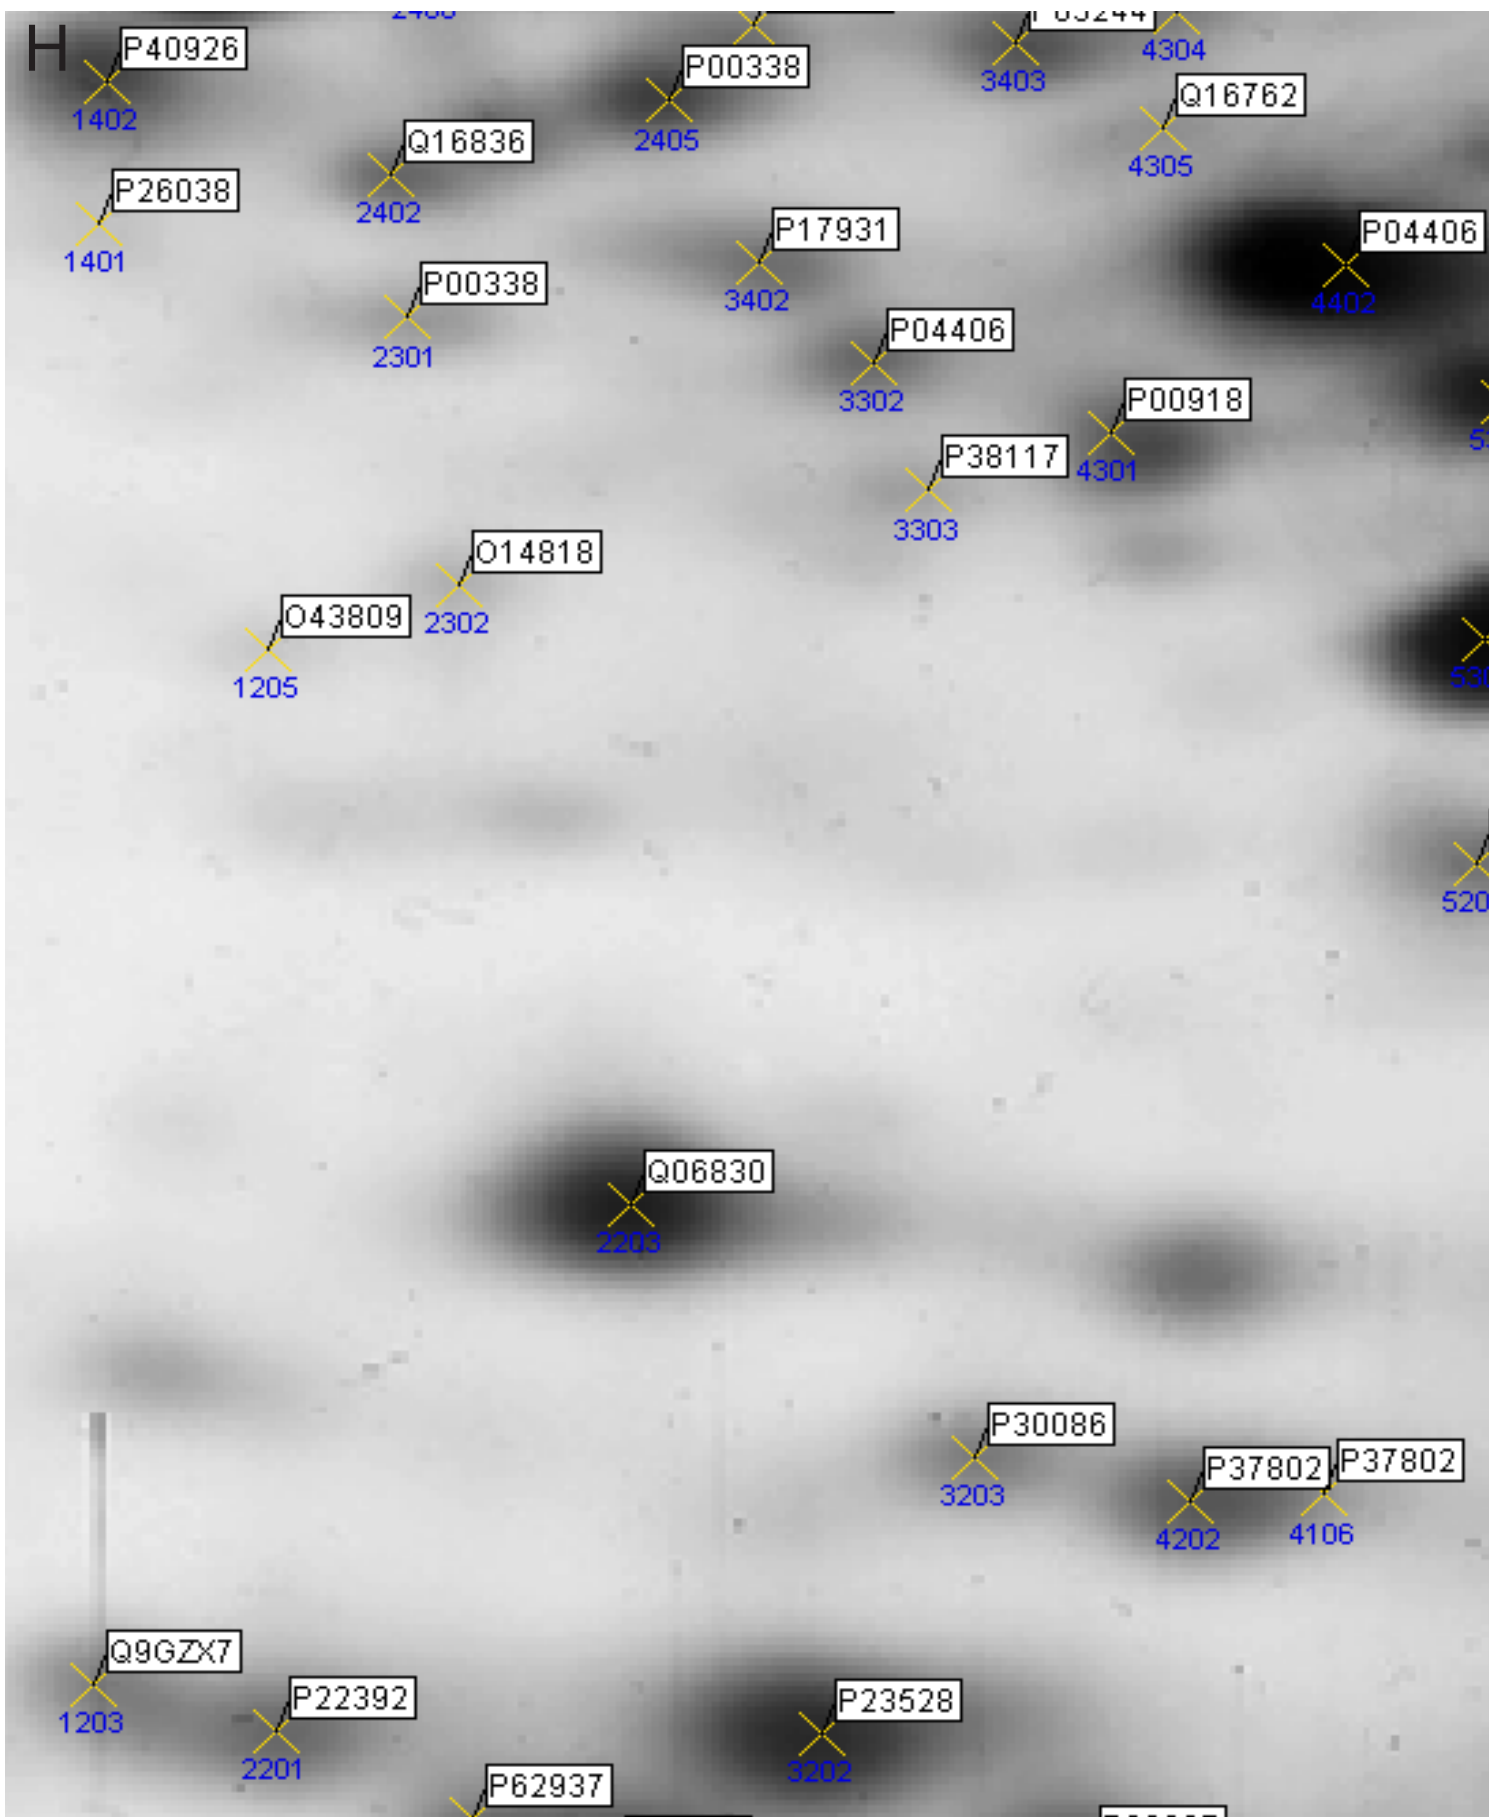

Supplement: supp_M112.019786_mcp.M112.019786-27.pdf [file supp_M112.019786_mcp.M112.019786-27.pdf]

0702

8

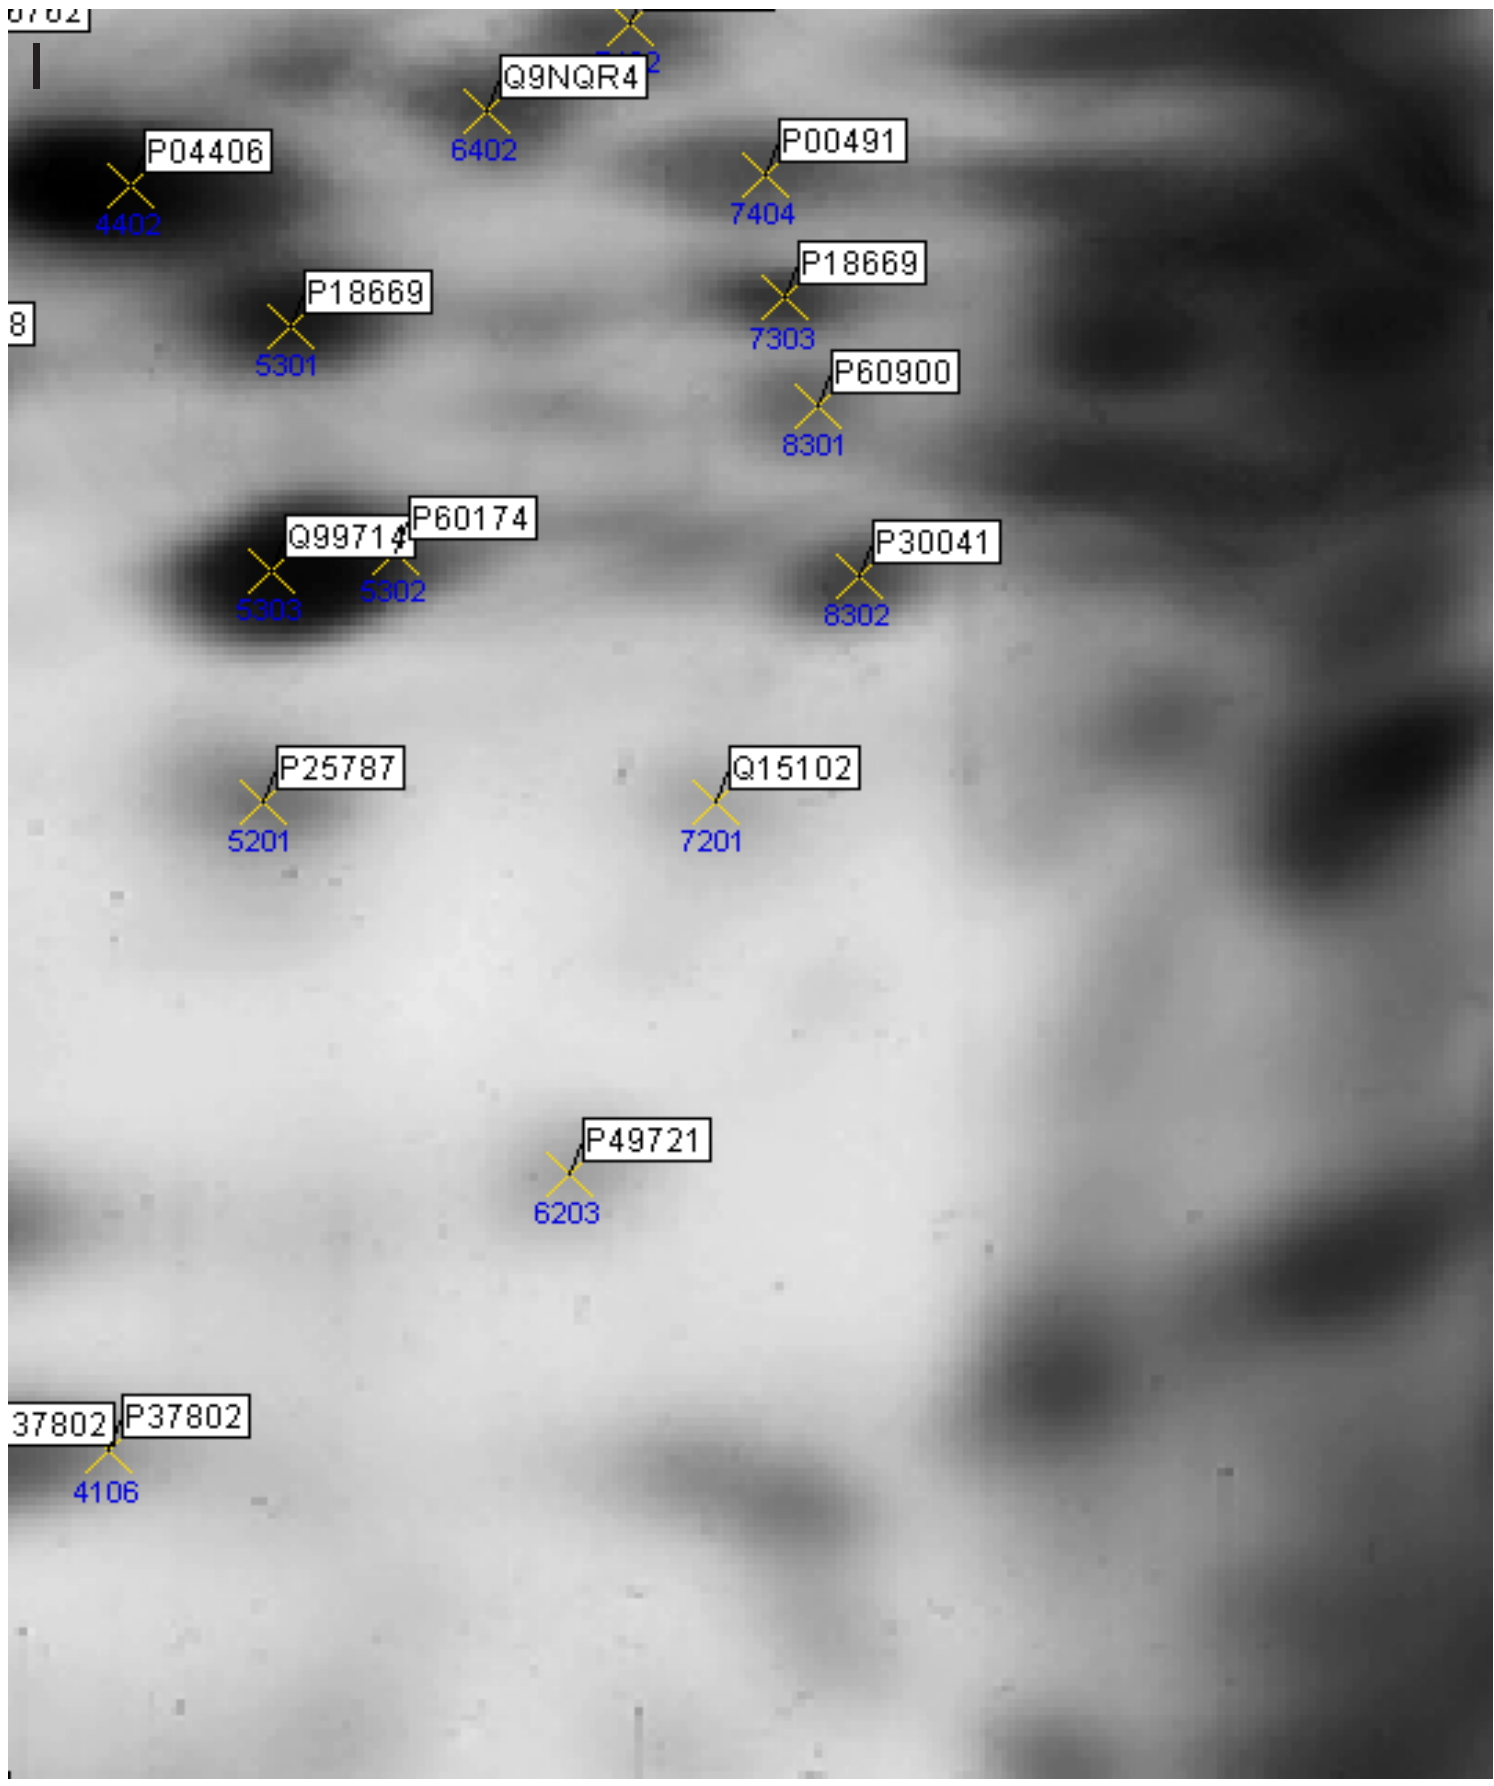

Supplement: supp_M112.019786_mcp.M112.019786-28.pdf [file supp_M112.019786_mcp.M112.019786-28.pdf]

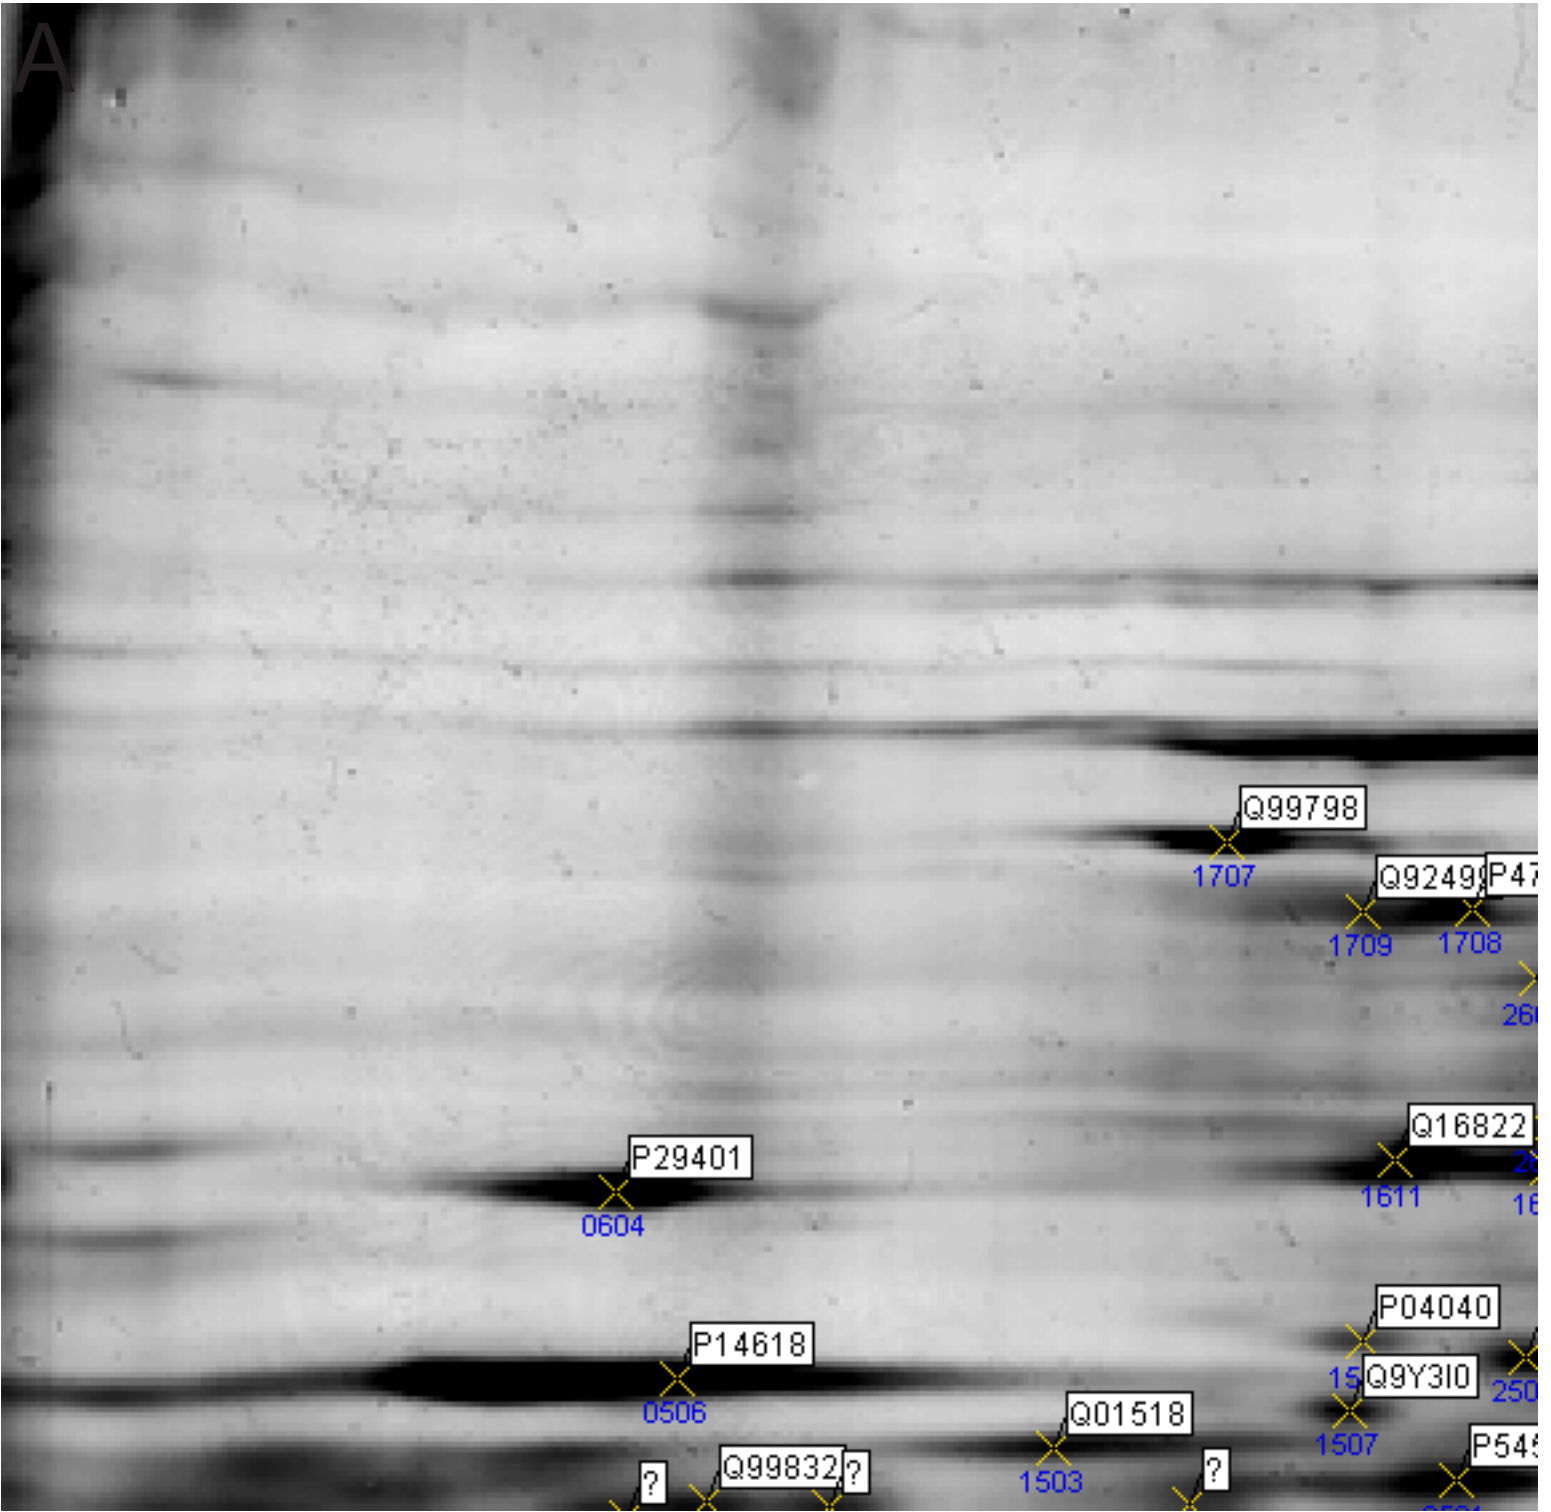

Supplement: supp_M112.019786_mcp.M112.019786-3.pdf [file supp_M112.019786_mcp.M112.019786-3.pdf]

K

Q9GZX7  
1203

P22  
2201

P69905  
1101

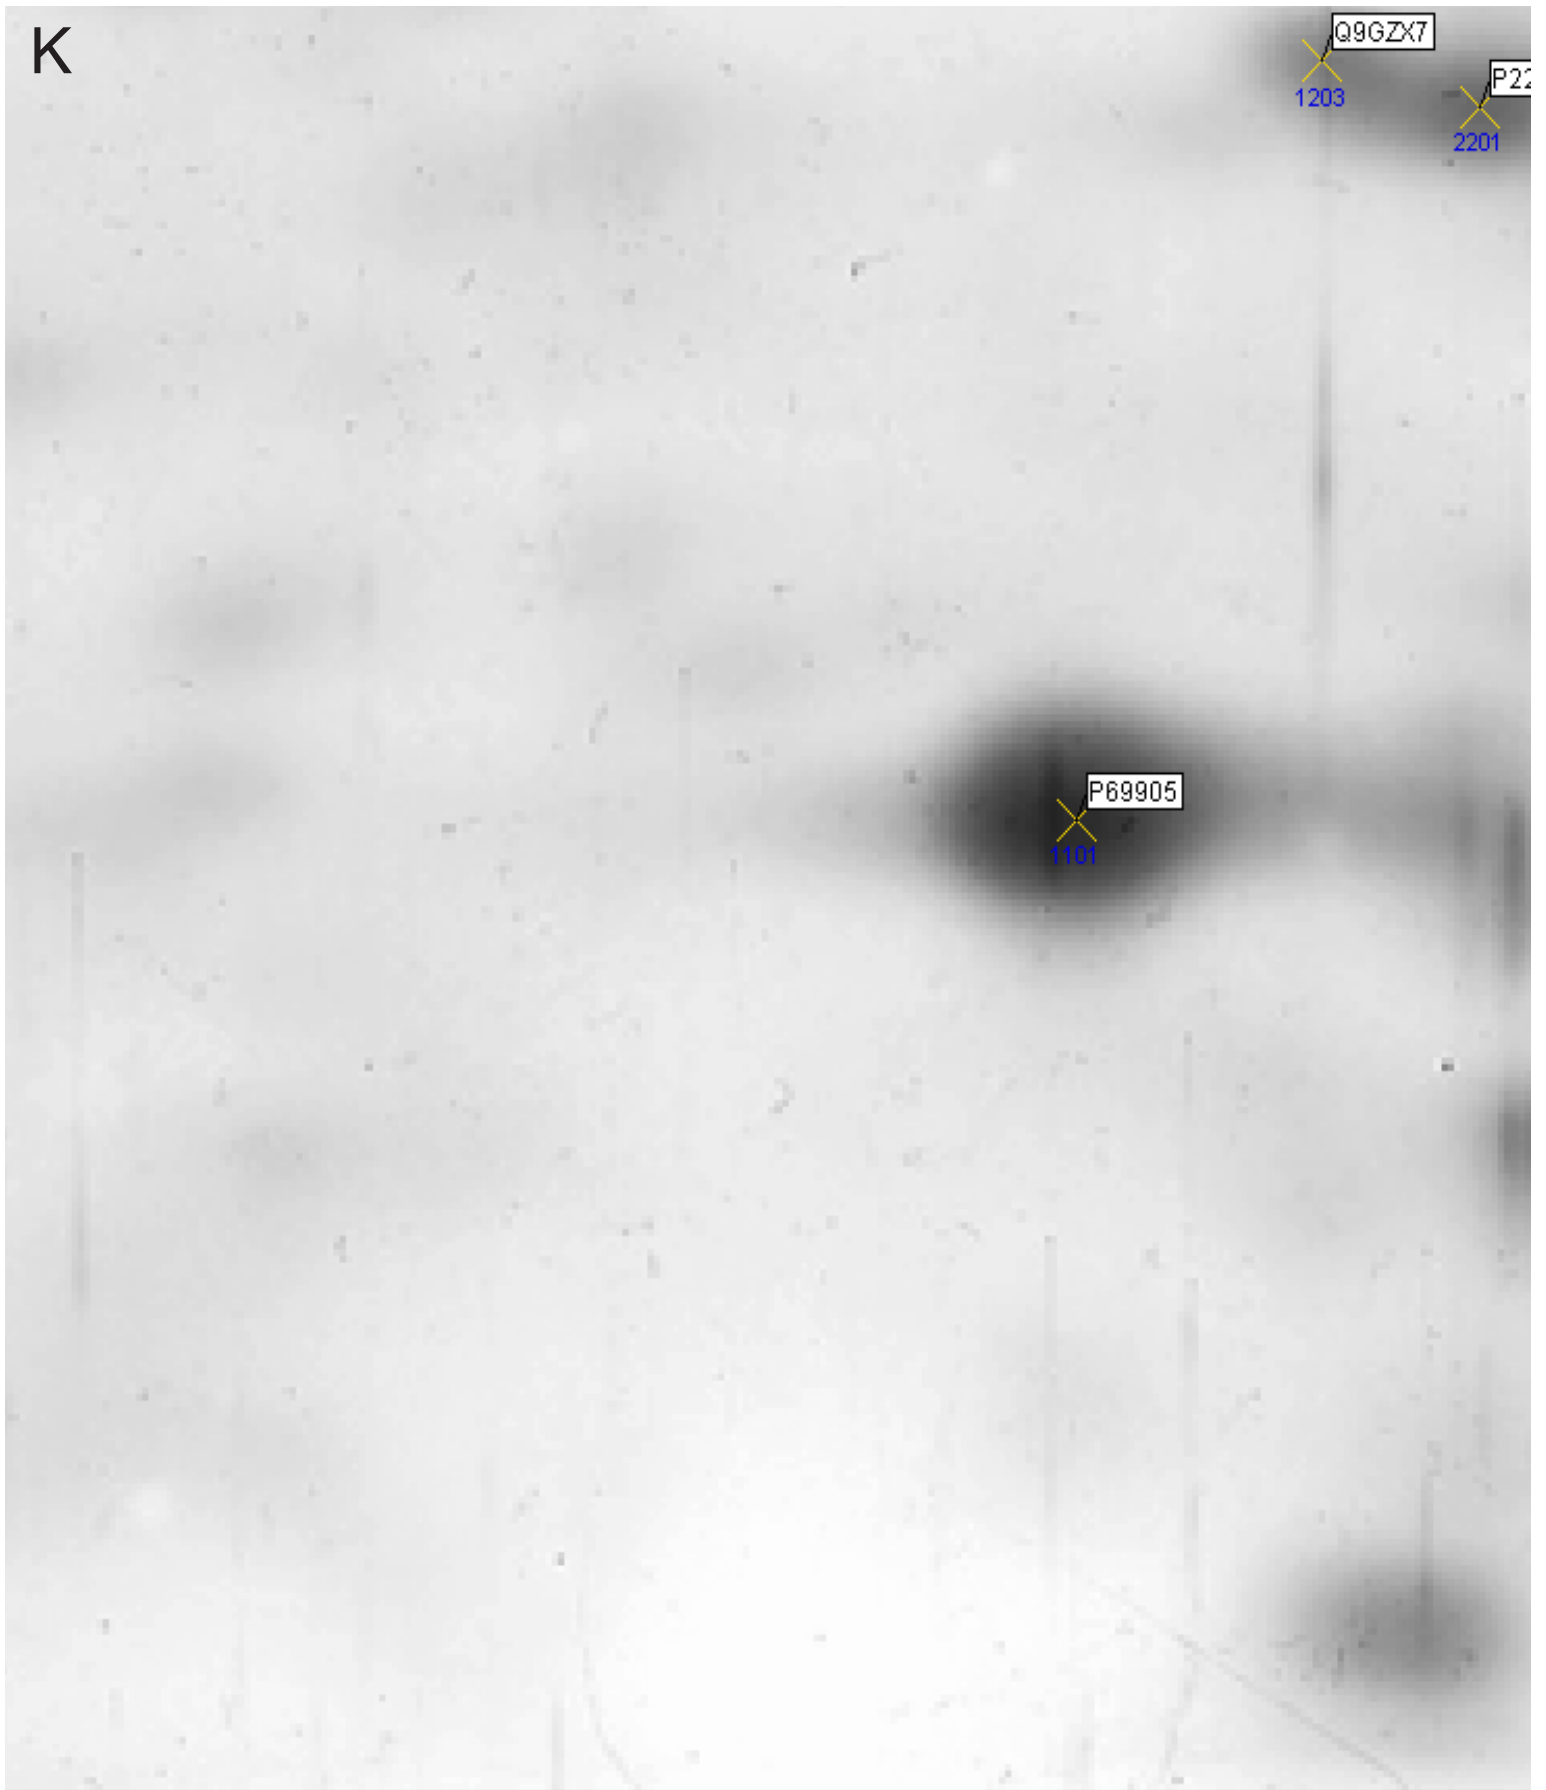

Supplement: supp_M112.019786_mcp.M112.019786-30.pdf [file supp_M112.019786_mcp.M112.019786-30.pdf]

L

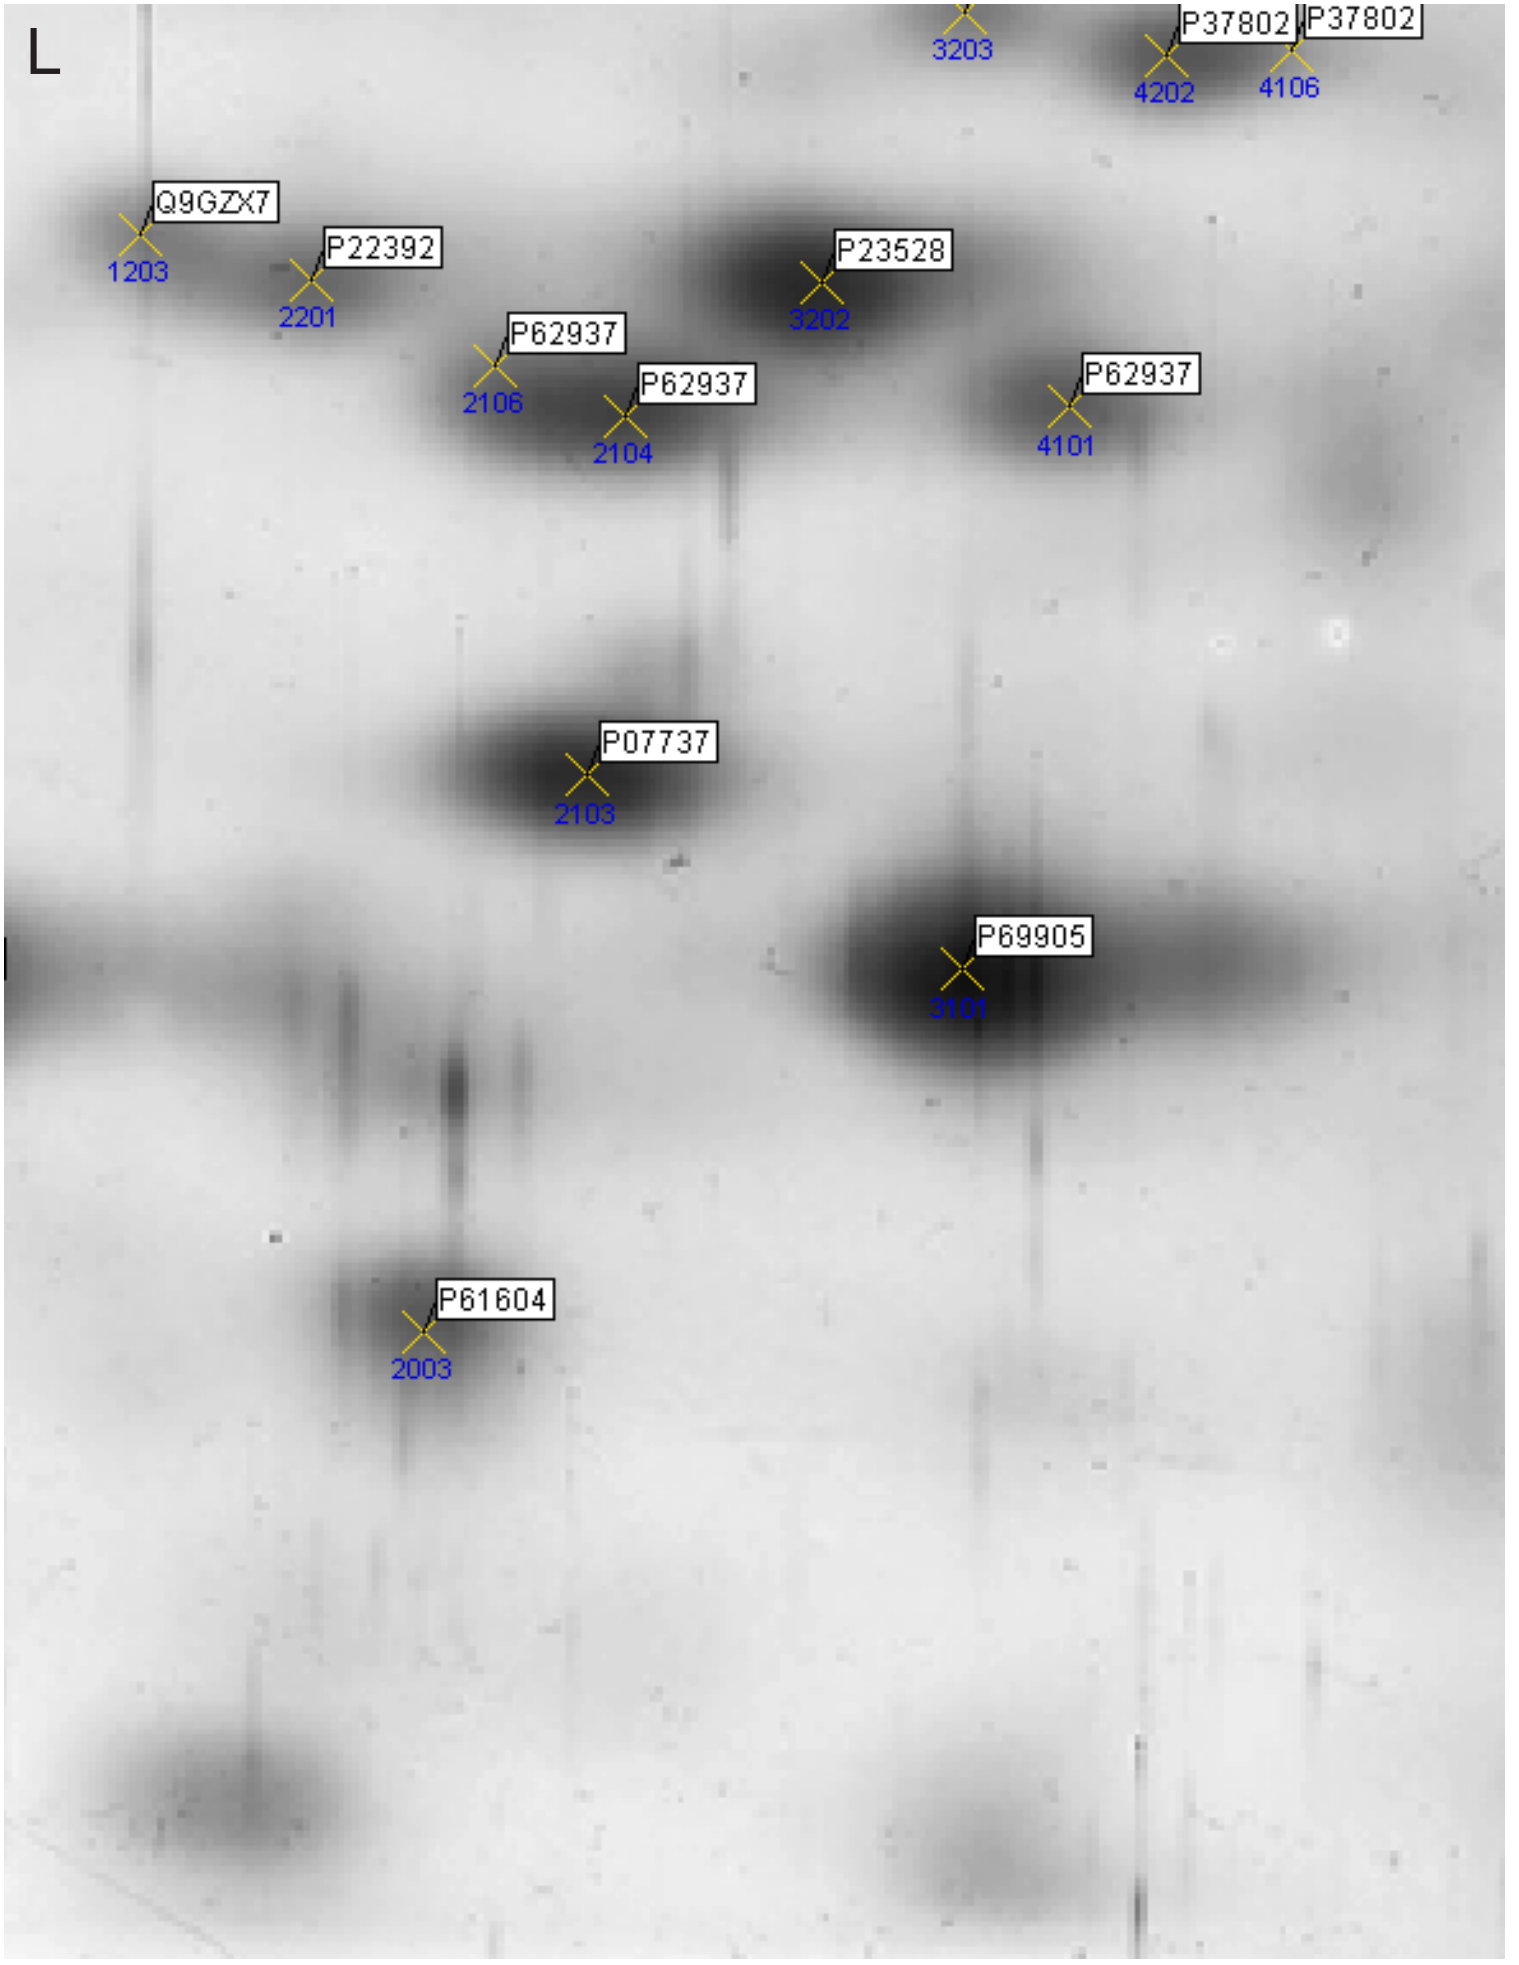

Supplement: supp_M112.019786_mcp.M112.019786-31.pdf [file supp_M112.019786_mcp.M112.019786-31.pdf]

invasive

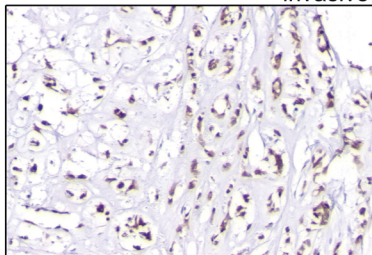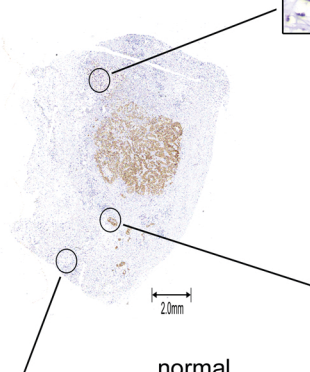

carcinoma in situ

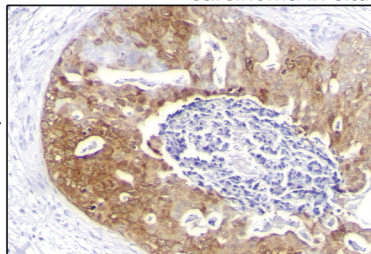

normal

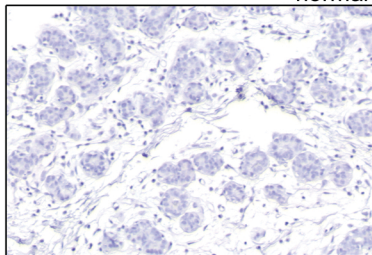

Supplement: supp_M112.019786_mcp.M112.019786-32.pdf [file supp_M112.019786_mcp.M112.019786-32.pdf]

**negative MAGE-A4**

**A**

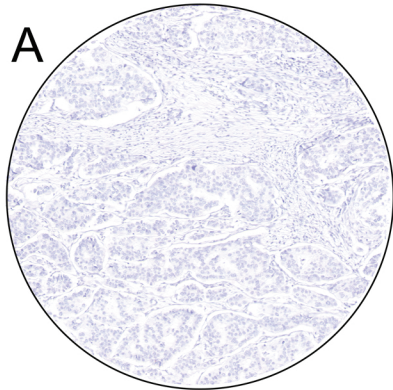

**B**

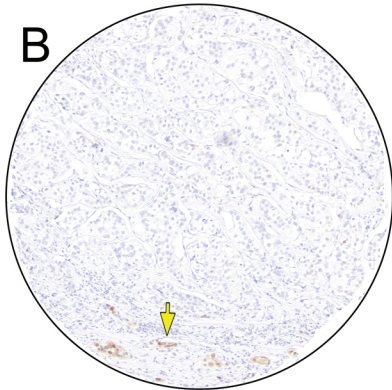

**C**

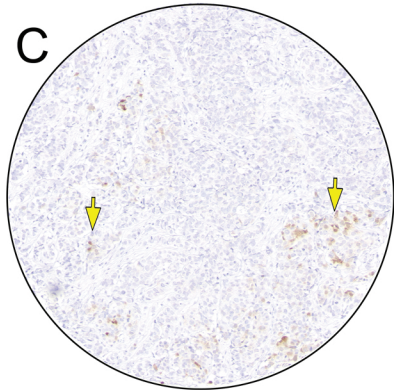

**positive MAGE-A4**

**D**

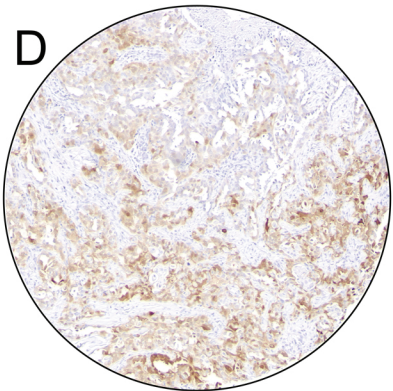

**E**

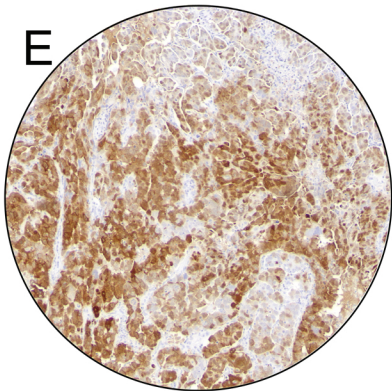

**F**

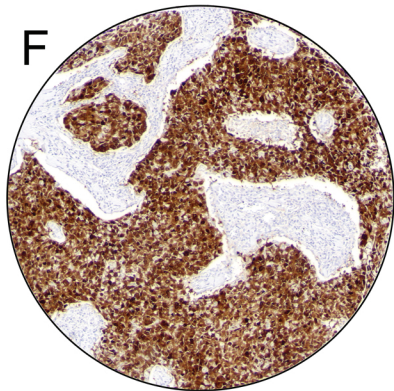

Supplement: supp_M112.019786_mcp.M112.019786-33.pdf [file supp_M112.019786_mcp.M112.019786-33.pdf]

C

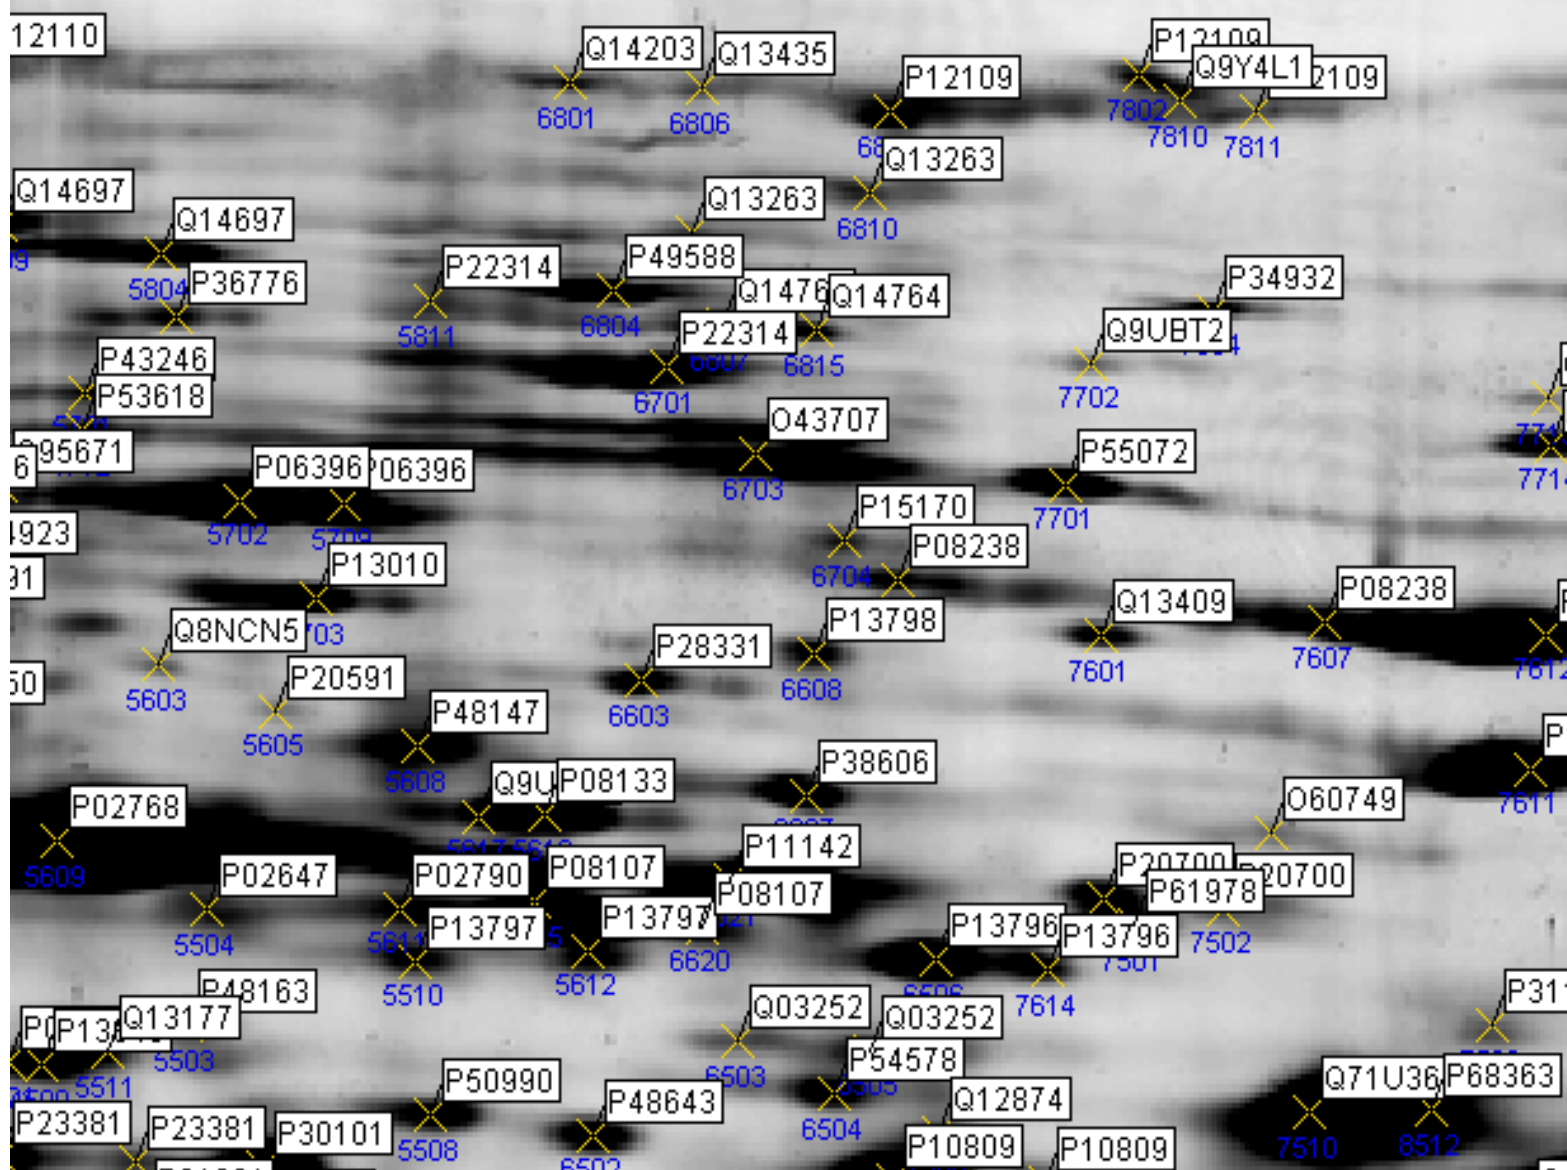

Supplement: supp_M112.019786_mcp.M112.019786-5.pdf [file supp_M112.019786_mcp.M112.019786-5.pdf]

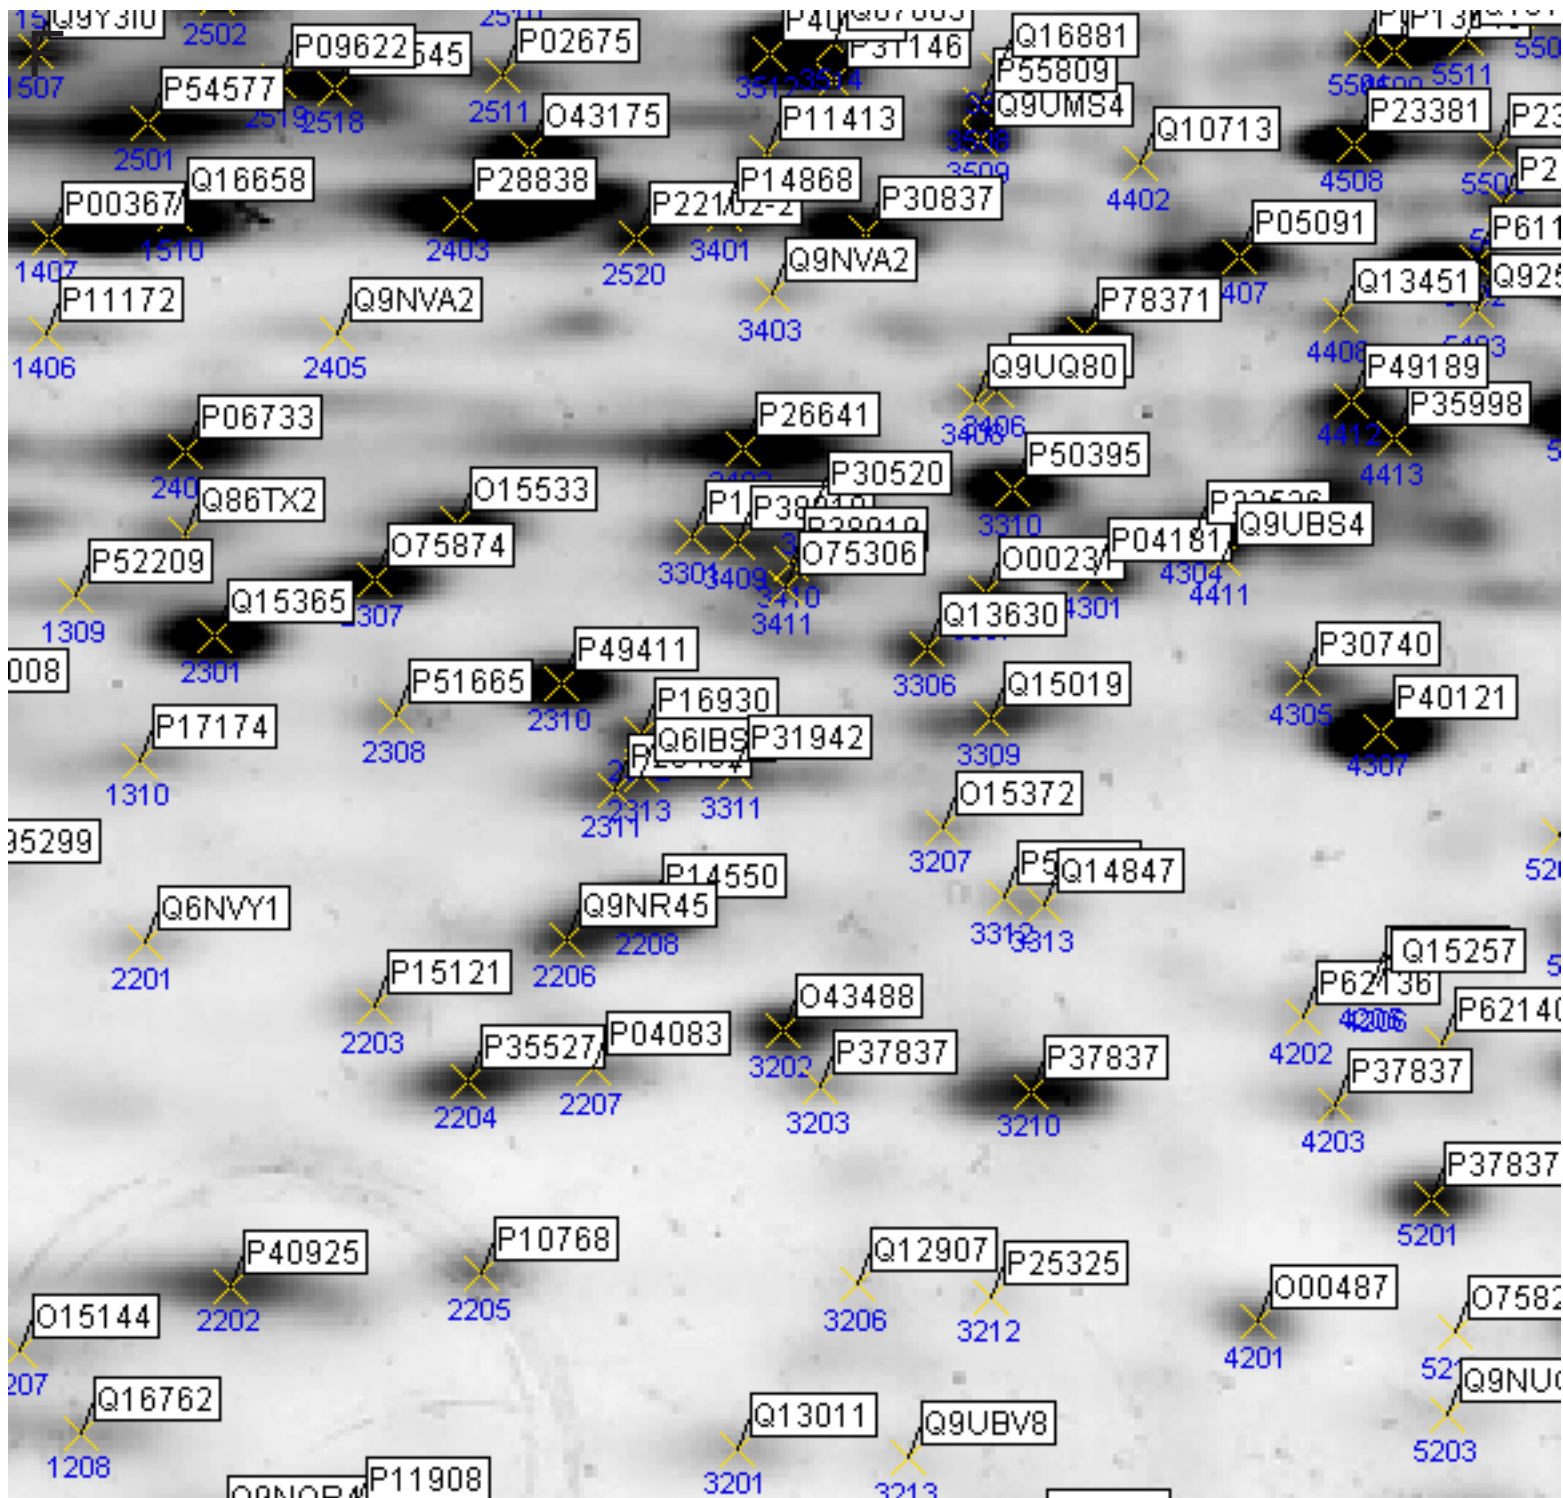

Supplement: supp_M112.019786_mcp.M112.019786-8.pdf [file supp_M112.019786_mcp.M112.019786-8.pdf]
